# Supplementary material for: Evaluating the effect of metabolic traits on oral and oropharyngeal cancer risk using Mendelian randomization
Source: medRxiv preprint, doi:10.1101/2022.08.10.22278617, version 3 (2022-08-18)
Supplement: Supplementary file 1 [file 278617_file02.xlsx]

## Sheet: BMI
Phenotype	SNP	Nearest gene	effect allele	other allele	eaf	beta	se	p-value
BMI	rs10044136	MFAP3	C	G	0.565	-0.0162	0.0017	3.06e-21
BMI	rs10099330	TSNARE1	A	G	0.538	-0.0119	0.0017	3.22e-12
BMI	rs10116186	GNAQ	A	G	0.4591	-0.0116	0.0019	1.62e-09
BMI	rs10132280		A	C	0.311	-0.0214	0.0018	2.28e-33
BMI	rs10203386	ADCY3	A	T	0.4506	0.0318	0.0017	1.43e-78
BMI	rs1030015	MAGI2	T	G	0.5422	0.0109	0.0017	1.16e-10
BMI	rs1045411	HMGB1	T	C	0.2807	-0.0139	0.0019	6.66e-14
BMI	rs1048303	AP1S1	T	C	0.5817	-0.011	0.0017	1.49e-10
BMI	rs10497870	NBEAL1	A	G	0.6092	0.0121	0.0016	1.97e-13
BMI	rs10499694	DDC	A	G	0.4935	0.013	0.0016	1.29e-15
BMI	rs10510419	PPARG	T	G	0.1467	-0.0168	0.0023	2.23e-13
BMI	rs10518269	ZNF536	T	C	0.165	-0.0173	0.0023	4.69e-14
BMI	rs10744146	RNU6-837P	A	G	0.5355	-0.0113	0.0017	2.54e-11
BMI	rs10761247	PHF2	A	G	0.587	-0.0113	0.0017	4.53e-11
BMI	rs10761785	REEP3	T	G	0.5136	-0.0133	0.0016	3.47e-16
BMI	rs10823893	PRKG1	A	G	0.407	0.0124	0.0019	1.55e-10
BMI	rs10858334	OLFM1	C	G	0.8484	-0.0148	0.0025	4.91e-09
BMI	rs10887584	GRID1	A	G	0.448	0.0126	0.0019	4.57e-11
BMI	rs10920678		A	G	0.425	0.0149	0.0016	7.15e-20
BMI	rs10929925		A	C	0.4105	-0.0142	0.0016	3.05e-18
BMI	rs10938397	PRKRIRP9	A	G	0.57	-0.0322	0.0016	2.42e-86
BMI	rs10942267	SSBP2	A	G	0.6927	0.0148	0.0018	6.53e-16
BMI	rs10954772	PURG	T	C	0.3193	0.0155	0.0021	5.33e-14
BMI	rs10984756		C	G	0.9051	-0.0176	0.0028	4.37e-10
BMI	rs11047132	SOX5	T	G	0.9179	-0.0227	0.0031	1.59e-13
BMI	rs1106761		A	G	0.3745	0.0134	0.002	1.75e-11
BMI	rs1106908	GGNBP2	A	G	0.4454	-0.0161	0.0016	7.6e-23
BMI	rs11075489		T	C	0.4739	-0.0116	0.0017	1.23e-11
BMI	rs11105839		A	T	0.3729	-0.0113	0.0017	1.25e-11
BMI	rs11115176		T	C	0.7839	0.0131	0.0019	6.79e-12
BMI	rs11121210	RERE	T	C	0.3445	-0.0111	0.0017	2.37e-10
BMI	rs11170468		A	C	0.7826	0.013	0.0019	1.12e-11
BMI	rs11218510		A	G	0.3949	-0.014	0.002	6.79e-13
BMI	rs112566467	MACF1	T	C	0.2071	0.0184	0.0024	5.86e-15
BMI	rs11525873	TTC26	T	C	0.8995	0.0232	0.0032	2.98e-13
BMI	rs11577094	DNALI1	T	C	0.0791	0.0186	0.003	3.28e-10
BMI	rs11611246	WNK1	T	G	0.199	0.0223	0.002	2.04e-28
BMI	rs11633626		A	C	0.6313	-0.0157	0.0018	7.27e-19
BMI	rs11636611		T	C	0.4981	0.0104	0.0017	8.85e-10
BMI	rs11655587		T	C	0.3572	-0.021	0.002	6.87e-26
BMI	rs11672660	GIPR	T	C	0.1871	-0.0338	0.0021	6.83e-60
BMI	rs1167821	PMS2P3	A	T	0.5535	-0.0201	0.0019	9.38e-26
BMI	rs11692326		T	C	0.2302	0.0147	0.0019	1.69e-14
BMI	rs11739877		T	C	0.6231	0.0116	0.0018	4.01e-11
BMI	rs11757278	PHACTR1	T	C	0.6961	0.0133	0.0019	6.92e-13
BMI	rs11836108	GOLGA3	A	G	0.296	0.0113	0.0018	8.37e-10
BMI	rs11856579	LINGO1	A	G	0.2608	-0.0161	0.0019	1.38e-16
BMI	rs11866815	AXIN1	T	C	0.2568	-0.0153	0.0019	2.21e-16
BMI	rs11915371		A	C	0.8019	-0.0154	0.0021	2.29e-13
BMI	rs12049202	AK5	T	C	0.1883	0.0239	0.0021	3.35e-29
BMI	rs12072739	DPYD	A	G	0.7762	-0.0169	0.0023	1.5e-13
BMI	rs12098284	ADK	T	C	0.1212	0.0184	0.0026	9.87e-13
BMI	rs12121950	AGBL4	T	G	0.3355	0.0185	0.0018	7.09e-24
BMI	rs12140153	INADL	T	G	0.0911	-0.0353	0.0034	1.44e-25
BMI	rs12151152	TMEM160	A	G	0.4087	-0.021	0.002	6.51e-27
BMI	rs12206094	FOXO3	T	C	0.2896	-0.0143	0.0018	1.93e-15
BMI	rs12282785		A	C	0.2204	-0.0157	0.0023	1.43e-11
BMI	rs12286929		A	G	0.5007	-0.0177	0.0016	1.93e-27
BMI	rs12321904	RNU4-32P	T	G	0.5004	0.0096	0.0016	2.69e-09
BMI	rs12364470		T	G	0.8535	-0.0187	0.0022	2.18e-17
BMI	rs12369179	ZCCHC8	T	C	0.085	-0.034	0.0031	2.32e-28
BMI	rs12422552	GNAI2P1	C	G	0.2689	-0.0131	0.0019	1.78e-11
BMI	rs12429545		A	G	0.1218	0.0313	0.0024	1.42e-37
BMI	rs12438629		C	G	0.9678	0.0347	0.0052	2.09e-11
BMI	rs12449219		C	G	0.856	-0.0164	0.0026	1.44e-10
BMI	rs12462975	CCNE1	A	G	0.3243	0.0193	0.0018	1.47e-25
BMI	rs12509234		T	C	0.7214	-0.0116	0.0019	3.89e-10
BMI	rs12628051	TNRC6B	T	C	0.6407	0.0161	0.0018	2.9e-19
BMI	rs12628891	MICALL1	T	C	0.3186	-0.0115	0.0019	5.85e-10
BMI	rs12635553	TNIK	A	T	0.486	0.0099	0.0017	4.1e-09
BMI	rs12680842		A	G	0.6839	0.0142	0.0017	3.41e-16
BMI	rs12681792	CLVS1	A	C	0.2024	0.015	0.0021	2.88e-12
BMI	rs1269175		A	G	0.5111	0.0105	0.0017	8.09e-10
BMI	rs12692596	RBMS1	T	C	0.3618	0.012	0.0017	1.03e-12
BMI	rs12714199		T	C	0.6146	-0.0141	0.0017	3.22e-16
BMI	rs12765914		T	C	0.0801	0.0226	0.0031	1.96e-13
BMI	rs1277733	CACNB2	T	C	0.7664	0.012	0.002	4.3e-09
BMI	rs12868881		A	T	0.4066	0.0138	0.0017	1.4e-15
BMI	rs12922346		C	G	0.2641	0.0133	0.002	1.48e-11
BMI	rs12939549	RPTOR	A	G	0.5572	0.018	0.0016	3.68e-28
BMI	rs13002946	LINC01104	A	T	0.2652	-0.0177	0.0019	3.9e-20
BMI	rs13021737		A	G	0.1567	-0.0578	0.0021	2.89e-161
BMI	rs13033310	NCKAP5	A	G	0.2519	0.0146	0.0022	3.4e-11
BMI	rs13107325	SLC39A8	T	C	0.082	0.0468	0.0032	3.81e-47
BMI	rs13110266		A	G	0.4037	-0.0124	0.0016	3.96e-14
BMI	rs13174863		A	G	0.8542	-0.0197	0.0023	1.94e-17
BMI	rs13191362	PARK2	A	G	0.8572	0.0235	0.0025	4.08e-21
BMI	rs1320251	KCNJ12	T	C	0.4566	-0.0177	0.0017	5.51e-25
BMI	rs1346841		A	G	0.4116	-0.0126	0.0017	3.18e-13
BMI	rs1356506	RIT2	T	C	0.6287	0.0137	0.0018	8.39e-15
BMI	rs1383592	ZFPM2	A	G	0.212	0.0122	0.0021	4.92e-09
BMI	rs140733155	PRMT2	A	G	0.9889	-0.0559	0.0094	2.97e-09
BMI	rs1409818	NKX2-4	T	C	0.1074	0.0195	0.0028	2.59e-12
BMI	rs1431659	KCNB2	A	G	0.2737	0.0191	0.0019	2.33e-23
BMI	rs1436344		C	G	0.5703	0.0147	0.0017	1.07e-17
BMI	rs1437842	GALNTL6	A	G	0.4907	-0.0106	0.0017	8.49e-10
BMI	rs1451077		A	G	0.5776	-0.0169	0.0019	1.43e-18
BMI	rs1451109		A	G	0.6849	-0.0158	0.0017	1.36e-19
BMI	rs1470545		T	C	0.0374	0.037	0.0043	5.6e-18
BMI	rs1471212	OTUD7A	A	T	0.4732	0.0109	0.0017	1.51e-10
BMI	rs1481012	ABCG2	A	G	0.8895	0.0188	0.0026	5.11e-13
BMI	rs1491905		T	C	0.4725	0.0147	0.0017	3.92e-18
BMI	rs1501673	LINC00461	A	G	0.1355	0.0289	0.0025	2.73e-31
BMI	rs1522569		T	G	0.8183	0.0141	0.0022	1.6e-10
BMI	rs1536053	TEX29	T	C	0.3104	-0.0122	0.0019	8.02e-11
BMI	rs1561554		C	G	0.6089	-0.0115	0.0017	4.89e-11
BMI	rs1658820	CSMD1	T	G	0.2389	0.0132	0.002	3.77e-11
BMI	rs16851483	RASA2	T	G	0.0717	0.0352	0.0034	4.87e-25
BMI	rs16989232	MAFB	A	G	0.3864	0.0115	0.0017	6.19e-12
BMI	rs17001561	SCARB2	A	G	0.1548	0.0145	0.0023	1.81e-10
BMI	rs17024393	GNAT2	T	C	0.9689	-0.0644	0.0049	7.11e-39
BMI	rs17201143	SALL4	T	C	0.3054	-0.0112	0.0018	1.1e-09
BMI	rs17276464		T	C	0.4143	0.0096	0.0016	4.81e-09
BMI	rs1730859	PRMT6	A	G	0.651	-0.012	0.0017	2.96e-12
BMI	rs17405819		T	C	0.6845	0.0211	0.0018	6.04e-33
BMI	rs17636031		T	C	0.7244	-0.0154	0.0018	3.87e-17
BMI	rs17681451	ZBTB20	A	G	0.0762	-0.0225	0.0031	7.37e-13
BMI	rs17806224		A	G	0.1808	-0.026	0.0022	7.91e-32
BMI	rs1852006	MAGI2	A	G	0.376	-0.0153	0.0018	6.71e-18
BMI	rs1884389	FKBP1A	T	C	0.4386	-0.0108	0.0017	3.72e-10
BMI	rs1884429	MASP2	T	C	0.2348	0.0134	0.0019	2.3e-12
BMI	rs1884897		A	G	0.3747	-0.0184	0.0017	2.7e-28
BMI	rs1899689	CADPS2	T	C	0.3939	0.012	0.0017	4.2e-13
BMI	rs1916801	FHIT	A	T	0.616	0.0169	0.0017	1.93e-24
BMI	rs1927790	HS6ST3	T	C	0.606	-0.014	0.0016	1.57e-17
BMI	rs1928295		T	C	0.5712	0.0134	0.0016	2.23e-16
BMI	rs194809	CHP2	A	G	0.1871	0.0126	0.0022	4.86e-09
BMI	rs1951455	RPS6KA5	T	C	0.2813	-0.0148	0.0019	6.05e-15
BMI	rs1954494	LINC00643	T	C	0.5608	0.0097	0.0016	2.43e-09
BMI	rs1982350	ARNTL	A	G	0.3556	-0.0156	0.0018	1.98e-18
BMI	rs1982441	ELP3	T	G	0.1322	0.017	0.0025	2.17e-11
BMI	rs1996120	RNU6-1	A	G	0.4228	-0.0167	0.0016	3.88e-24
BMI	rs2033529		A	G	0.7251	-0.0201	0.0018	2.05e-29
BMI	rs2051559	RGS12	T	C	0.8588	-0.0167	0.0025	3.78e-11
BMI	rs2053682	RANBP17	A	C	0.6784	0.017	0.0018	2.59e-20
BMI	rs2065418	MPPED2	T	G	0.646	0.0139	0.0018	6.07e-15
BMI	rs2112347	POC5	T	G	0.6298	0.0276	0.0017	1.17e-61
BMI	rs2134858	TRPM3	T	C	0.5119	-0.0117	0.0017	5.87e-12
BMI	rs215614	PDE1C	A	G	0.6246	-0.0144	0.0018	2.77e-16
BMI	rs217669		T	C	0.7224	-0.0172	0.0021	6.27e-16
BMI	rs2183824	LINGO2	T	C	0.3135	0.0234	0.0017	2.29e-41
BMI	rs2192158	KIT	A	G	0.4492	0.0137	0.0017	7.42e-16
BMI	rs2196618	RALYL	A	G	0.2634	-0.0137	0.0019	1.49e-12
BMI	rs2206277	TFAP2B	T	C	0.1557	0.0408	0.0021	1.82e-83
BMI	rs2228213	HIVEP1	A	G	0.3374	-0.0144	0.0017	5.5e-17
BMI	rs2246012	ARG1	T	C	0.8512	-0.0161	0.0022	1.15e-13
BMI	rs2342892	RBBP6	T	G	0.4855	0.0126	0.0017	1.33e-13
BMI	rs2357760	MIR3144	A	G	0.6735	0.0143	0.0017	2.11e-16
BMI	rs2391540		A	T	0.6718	-0.0139	0.0018	1.36e-14
BMI	rs2396625		A	T	0.4183	-0.0176	0.0017	2.81e-24
BMI	rs2400414		T	C	0.3461	-0.0126	0.0018	5.52e-13
BMI	rs2439823	CRTAC1	A	G	0.4514	-0.0165	0.0017	6.51e-22
BMI	rs2601777	ADCY9	A	G	0.386	-0.0143	0.0017	2.84e-17
BMI	rs2605603	SMCO4	A	G	0.4812	-0.0103	0.0016	2.04e-10
BMI	rs2619976	LINC00469	T	C	0.4011	0.0105	0.0018	1.99e-09
BMI	rs2622274	PTP4A1	T	G	0.4553	-0.0107	0.0017	3.23e-10
BMI	rs264962		C	G	0.5428	0.0119	0.0017	1.74e-12
BMI	rs2715423	PGPEP1L	A	G	0.2805	-0.0115	0.0019	1.9e-09
BMI	rs273505	MAST3	T	C	0.5783	-0.0173	0.0019	3.32e-19
BMI	rs2777768		A	G	0.7228	0.0119	0.0019	6.38e-10
BMI	rs2820295	IPO9	A	G	0.3266	0.0235	0.0018	5.56e-39
BMI	rs2832283	BACH1	A	G	0.2254	0.0115	0.002	4.72e-09
BMI	rs28350	LYZL4	A	G	0.1717	0.0172	0.0022	1.07e-14
BMI	rs2861089		A	T	0.3806	0.0105	0.0017	1.55e-09
BMI	rs2861685		T	C	0.5864	0.0165	0.0019	7.82e-18
BMI	rs2862996	HSD17B12	T	G	0.7012	-0.0216	0.0017	3.6e-35
BMI	rs288230	FBXL17	T	C	0.8394	0.0238	0.0023	4.67e-26
BMI	rs2907948	KCNH2	A	G	0.244	-0.0145	0.0019	1.95e-14
BMI	rs2968487	UBE2WP1	T	C	0.2772	0.0176	0.0018	7.55e-22
BMI	rs3101336	NEGR1	T	C	0.3825	-0.0254	0.0016	4.8e-54
BMI	rs34277166		A	G	0.44	0.0144	0.0019	8.26e-14
BMI	rs34811474	ANAPC4	A	G	0.2224	-0.0293	0.0023	8.5e-38
BMI	rs349088	DLG2	A	C	0.4777	-0.013	0.0017	3.5e-14
BMI	rs354508	TUSC3	T	C	0.1617	-0.0146	0.0023	2.69e-10
BMI	rs355777	DHX36	C	G	0.3984	0.0151	0.0017	2.13e-18
BMI	rs35851183	PCAT4	A	G	0.6424	-0.0121	0.002	1.07e-09
BMI	rs36061954	FGFR1	T	C	0.3978	0.0119	0.0019	1.05e-09
BMI	rs3739514	FIBCD1	A	G	0.3384	0.0132	0.002	6.64e-11
BMI	rs3744017	TRIM47	A	G	0.1931	0.0139	0.0022	2.43e-10
BMI	rs3770799	FEZ2	A	G	0.6367	-0.0114	0.0018	1.21e-10
BMI	rs3806114	E2F3	A	G	0.6916	-0.012	0.0018	1.46e-11
BMI	rs3808477	TRPS1	T	C	0.274	-0.0182	0.0019	8.73e-22
BMI	rs3811125	NFIL3	T	C	0.2806	-0.0152	0.0021	9.42e-13
BMI	rs3825061	VPS11	T	C	0.3863	0.014	0.0017	6.15e-16
BMI	rs3923783	RTN4RL1	A	C	0.1784	-0.0222	0.0022	4.12e-23
BMI	rs3930349	ASIC2	A	C	0.2089	-0.014	0.002	7.68e-12
BMI	rs39654	NLGN1	A	G	0.4513	-0.0163	0.0017	1.75e-21
BMI	rs4097319		T	G	0.5641	0.0107	0.0017	4.32e-10
BMI	rs4123853	SGCZ	T	C	0.3727	0.014	0.0017	1.06e-15
BMI	rs41284828	DLEU1	A	G	0.0302	-0.0341	0.0057	3e-09
BMI	rs4256980	TRIM66	C	G	0.3305	-0.0187	0.0017	8.63e-29
BMI	rs427943	ADARB1	A	C	0.4288	-0.0177	0.0017	3.6e-25
BMI	rs4290163	C10orf32	T	G	0.398	0.013	0.0017	3.5e-15
BMI	rs4307239	NPY	A	G	0.5361	-0.0115	0.0017	1.47e-11
BMI	rs4421883	CCT5P2	T	C	0.4946	-0.0103	0.0017	1.79e-09
BMI	rs459552		A	T	0.7747	-0.0133	0.0019	8.36e-12
BMI	rs4609871		T	C	0.5397	0.0219	0.0017	6.62e-38
BMI	rs4671328	LINC01122	T	G	0.4496	0.0214	0.0017	3.42e-36
BMI	rs4700608	HTR1A	T	C	0.5236	-0.0155	0.0017	4.32e-20
BMI	rs4721089	MAD1L1	T	C	0.783	0.0167	0.0023	5.6e-13
BMI	rs4740619	CCDC171	T	C	0.5436	0.0189	0.0016	3.15e-31
BMI	rs4834272	ALPK1	T	C	0.6852	-0.0108	0.0017	3.46e-10
BMI	rs4841504	XKR6	A	C	0.5008	-0.0166	0.0016	5.41e-24
BMI	rs4857968	RNU6-815P	A	G	0.2933	-0.0125	0.0018	6.5e-12
BMI	rs487152	SLC22A3	A	C	0.4973	0.0108	0.0016	2.98e-11
BMI	rs4880341	JAKMIP3	T	C	0.5725	-0.013	0.0017	3.06e-14
BMI	rs4906263	TRAF3	C	G	0.6562	-0.0176	0.0018	8.11e-23
BMI	rs4973618	SPHKAP	A	G	0.6623	-0.0148	0.0018	1.25e-16
BMI	rs5215	KCNJ11	T	C	0.6314	0.0113	0.0017	1.22e-11
BMI	rs543874	SEC16B	A	G	0.7786	-0.0479	0.002	3.06e-125
BMI	rs561136	KDM1A	T	C	0.8691	-0.0186	0.0024	1.43e-14
BMI	rs56356382	ZBTB7A	T	C	0.8054	0.0217	0.0024	3.21e-19
BMI	rs57800857	MAML3	A	C	0.6344	0.0157	0.002	3.49e-15
BMI	rs592483	CCND1	T	C	0.5933	-0.0137	0.0017	1.53e-16
BMI	rs59302296	SETD5	A	T	0.0991	0.0217	0.0032	9.12e-12
BMI	rs594821	SALL3	T	C	0.0912	-0.0191	0.003	3.22e-10
BMI	rs615568	PTPRA	T	G	0.52	-0.0101	0.0017	3.85e-09
BMI	rs61813324	MEX3A	T	C	0.1312	0.0289	0.0028	3.2e-24
BMI	rs61828641	RABGAP1L	A	G	0.1092	0.0223	0.003	2.49e-13
BMI	rs6265	BDNF	T	C	0.1836	-0.0413	0.0021	7.4e-89
BMI	rs6443750	SOX2-OT	T	C	0.1994	-0.0152	0.0021	7.25e-13
BMI	rs6451675	ZNF131	C	G	0.3243	-0.014	0.0018	2.54e-14
BMI	rs6463489	FBXL18	T	C	0.0959	0.0167	0.0026	2.5e-10
BMI	rs6476617	ZCCHC7	A	G	0.3797	-0.0149	0.0017	1.53e-17
BMI	rs6477694	FRRS1L	T	C	0.6415	-0.0126	0.0017	6.57e-14
BMI	rs6493498		T	C	0.4465	0.0137	0.0016	4.84e-17
BMI	rs650198		T	C	0.7294	-0.0137	0.0019	6.43e-13
BMI	rs6512302	TCEA2	C	G	0.7391	0.0134	0.002	1.52e-11
BMI	rs6539064	C12orf42	C	G	0.7468	0.0194	0.0019	1.14e-23
BMI	rs6545714		A	G	0.6112	-0.0194	0.0016	4.01e-32
BMI	rs6556301	FGFR4	T	G	0.3707	-0.0113	0.0017	8.14e-11
BMI	rs6567160	RNU4-17P	T	C	0.7518	-0.0552	0.0019	7.82e-184
BMI	rs6591407	LRRC55	A	C	0.1984	-0.0124	0.0021	3.58e-09
BMI	rs6607337		T	C	0.2978	-0.0124	0.0019	2.55e-11
BMI	rs6661316	SYT14	T	C	0.5893	0.012	0.0016	1.72e-13
BMI	rs6690398	PDE4B	A	G	0.5501	0.0125	0.0017	1.92e-13
BMI	rs6720868	TRIP12	T	C	0.3083	0.0154	0.0018	1.82e-17
BMI	rs6804181	LSAMP	A	T	0.8215	0.0141	0.0023	6.47e-10
BMI	rs6804842		A	G	0.4301	-0.0141	0.0016	7.57e-18
BMI	rs6850421		A	G	0.4564	0.0113	0.0019	3.66e-09
BMI	rs6864049		A	G	0.489	-0.0121	0.0016	1.48e-13
BMI	rs6890310	CDH9	A	G	0.2923	-0.0119	0.0019	3.29e-10
BMI	rs6922607	GPR126	A	G	0.808	-0.013	0.0022	1.85e-09
BMI	rs6932930		A	G	0.785	-0.0257	0.0019	1.18e-40
BMI	rs6962280	ZMIZ2	A	G	0.4363	-0.014	0.0019	3.37e-13
BMI	rs698147	LINC01019	A	G	0.447	0.0116	0.0017	9.67e-12
BMI	rs7024334		T	G	0.2254	0.0135	0.002	4.71e-12
BMI	rs7037266		A	C	0.3576	-0.0106	0.0018	1.24e-09
BMI	rs704061		T	C	0.5535	-0.0142	0.0017	8.34e-17
BMI	rs7070670	ANK3	T	C	0.3228	-0.0126	0.0021	7.14e-10
BMI	rs7084454	MLLT10	A	G	0.3086	0.0198	0.0018	4.51e-27
BMI	rs709400		A	G	0.6214	0.0148	0.0017	5.7e-19
BMI	rs7124681	CELF1	A	C	0.4162	0.0257	0.0016	3.96e-55
BMI	rs7138803		A	G	0.387	0.0297	0.0017	3.1e-71
BMI	rs7144011	NRXN3	T	G	0.2334	0.0263	0.002	2.37e-40
BMI	rs7181610	DPH6	A	T	0.8553	0.0146	0.0025	4.5e-09
BMI	rs7206608	CDH13	C	G	0.6751	-0.013	0.0018	1.2e-12
BMI	rs7238896		A	G	0.8584	-0.0218	0.0028	2.49e-15
BMI	rs7239114	ZBTB7C	A	G	0.5414	0.012	0.0017	6.24e-13
BMI	rs72673947	EXT1	A	G	0.8902	-0.0223	0.0031	4.11e-13
BMI	rs7357754	GADD45G	A	G	0.4985	-0.012	0.0017	1.81e-12
BMI	rs740157		A	G	0.4501	0.0118	0.0016	4.76e-13
BMI	rs7498665	SH2B1	A	G	0.6179	-0.0285	0.0017	1.14e-66
BMI	rs7534091	RNA5SP56	A	G	0.7182	-0.012	0.0018	6.65e-11
BMI	rs7561278	LHCGR	T	C	0.7668	0.0169	0.0021	4.89e-16
BMI	rs7570446	RPS17P8	A	C	0.5397	0.0111	0.0019	4.74e-09
BMI	rs7575118	RNU6ATAC19P	T	C	0.1561	0.014	0.0024	3.33e-09
BMI	rs7588437		A	G	0.3664	-0.0165	0.0017	2.32e-22
BMI	rs7599312	ERBB4	A	G	0.2737	-0.0182	0.0018	1.52e-23
BMI	rs7607490		A	G	0.1099	0.0164	0.0027	1.21e-09
BMI	rs7616009	XXYLT1	A	G	0.1595	-0.0157	0.0024	4.33e-11
BMI	rs7631156	CPNE4	A	G	0.3091	0.0215	0.0018	3.33e-32
BMI	rs765875	HIVEP2	T	C	0.4689	-0.0132	0.0017	1.08e-14
BMI	rs7678054		A	G	0.4788	-0.0099	0.0017	4.57e-09
BMI	rs76942203		A	G	0.0587	0.0263	0.0041	9.08e-11
BMI	rs7713317		A	G	0.7198	-0.0166	0.0018	1.96e-20
BMI	rs7734385	EBF1	A	G	0.4449	-0.0101	0.0016	6.08e-10
BMI	rs77432547	MOB1AP1	A	G	0.7229	-0.017	0.0021	1.44e-15
BMI	rs7769594	LAP3P1	T	C	0.1602	0.0164	0.0023	2.13e-12
BMI	rs7777084	CALCR	A	G	0.462	0.0131	0.0017	1.58e-14
BMI	rs7802342	DGKI	T	G	0.7048	-0.0124	0.0019	6.23e-11
BMI	rs7826312	NRG1	T	C	0.4319	-0.0109	0.0016	3.23e-11
BMI	rs7893571	RSU1	T	G	0.6736	0.0125	0.0018	5.83e-12
BMI	rs7899106	GRID1	A	G	0.9496	-0.0327	0.0037	1.72e-18
BMI	rs7903146	TCF7L2	T	C	0.2787	-0.0178	0.0018	1.67e-23
BMI	rs79113395	CDK11B	A	G	0.266	-0.02	0.0022	2.03e-20
BMI	rs7944782	SNX19	T	G	0.5016	-0.0144	0.0017	3.61e-17
BMI	rs7975187		A	G	0.7712	-0.0137	0.0021	3.86e-11
BMI	rs8024806		T	C	0.9368	0.0254	0.0035	6.73e-13
BMI	rs8075273	MAP3K3	A	C	0.2878	-0.0137	0.0018	4.67e-14
BMI	rs8122855	ENTPD6	A	G	0.3377	0.0137	0.0018	4.11e-14
BMI	rs8134638	BRWD1	T	C	0.6273	-0.0133	0.002	1.57e-11
BMI	rs816367	MLIP	C	G	0.6491	-0.0107	0.0017	1.02e-09
BMI	rs8181823	LGMNP1	A	C	0.2344	-0.0125	0.002	4.36e-10
BMI	rs845084		A	G	0.2666	0.0136	0.0019	3.22e-12
BMI	rs867560		C	G	0.568	-0.0136	0.0017	1.24e-15
BMI	rs872281		T	C	0.1755	-0.0152	0.0023	1.56e-11
BMI	rs889398	NFAT5	T	C	0.4151	-0.0195	0.0016	3.23e-32
BMI	rs891387	C18orf8	T	C	0.4951	0.0208	0.0017	9.26e-35
BMI	rs930295	NRXN1	A	C	0.1548	0.0208	0.0023	2.03e-19
BMI	rs9320823		T	C	0.4118	-0.0165	0.0017	2.07e-21
BMI	rs942066	UNC79	A	G	0.373	-0.0202	0.002	2.36e-24
BMI	rs946824	AKT3	T	C	0.1355	0.0197	0.0025	4.82e-15
BMI	rs9540493	HNRNPA3P5	A	G	0.458	0.0129	0.0017	7.85e-15
BMI	rs9595908	PDS5B	T	C	0.6427	0.0154	0.0017	3.73e-20
BMI	rs9603697	RPL17P51	T	C	0.3184	0.0134	0.0018	1.69e-13
BMI	rs9808302	AGAP1	A	G	0.5278	-0.0116	0.0019	9.05e-10
BMI	rs9816226	DGKG	A	T	0.1755	-0.0315	0.0021	1.45e-50
BMI	rs9818122	CADM2-AS2	T	C	0.7933	-0.0228	0.002	3.97e-30
BMI	rs9826775	SSR3	A	G	0.8513	0.0155	0.0024	6.61e-11
BMI	rs9862795	ACTBP13	A	T	0.4762	-0.0264	0.0019	4.43e-44
BMI	rs9937053	FTO	A	G	0.4372	0.0721	0.0016	1e-200

## Sheet: Waist circumference
Phenotype	SNP	Nearest gene	effect allele	other allele	eaf	beta	se	p-value
Waist circumference	rs17381664	ZZZ3	C	T	0.425	0.022	0.0035	3.2635e-10
Waist circumference	rs7531118	RPL31P12	C	T	0.6083	0.027	0.0034	2.00272e-15
Waist circumference	rs543874	SEC16B	G	A	0.2667	0.044	0.0041	7.22488e-27
Waist circumference	rs11165623	UBE2WP1	A	G	0.4833	0.021	0.0033	1.97032e-10
Waist circumference	rs7550711	GPR61	T	C	0.0339	0.057	0.0096	2.89401e-09
Waist circumference	rs3127553	AGBL4	A	G	0.6333	-0.022	0.0034	9.76221e-11
Waist circumference	rs6545714		A	G	0.625	-0.022	0.0034	9.76221e-11
Waist circumference	rs2867110		C	G	0.125	-0.051	0.0043	1.89917e-32
Waist circumference	rs13404250		T	C	0.3667	-0.021	0.0035	1.97318e-09
Waist circumference	rs11676272	ADCY3	G	A	0.4828	0.021	0.0036	5.43309e-09
Waist circumference	rs929641	LINC01122	G	A	0.3833	-0.019	0.0033	8.53305e-09
Waist circumference	rs6440003	ZBTB38	A	G	0.4833	0.021	0.0033	1.97032e-10
Waist circumference	rs7649970	PPARG	T	C	0.075	0.027	0.0048	1.85508e-08
Waist circumference	rs2325036	CADM2	C	A	0.4083	-0.021	0.0033	1.97032e-10
Waist circumference	rs4234589	ETV5	G	A	0.0917	-0.032	0.0049	6.55014e-11
Waist circumference	rs10938397	PRKRIRP9	G	A	0.4333	0.032	0.0033	3.10586e-22
Waist circumference	rs2307111	POC5	C	T	0.425	-0.025	0.0033	3.57038e-14
Waist circumference	rs6864049		G	A	0.4333	0.019	0.0033	8.53305e-09
Waist circumference	rs806794		G	A	0.275	-0.022	0.0036	9.89398e-10
Waist circumference	rs943005		T	C	0.1	0.039	0.0042	1.60626e-20
Waist circumference	rs2357760	MIR3144	A	G	0.6583	0.019	0.0034	2.29389e-08
Waist circumference	rs3800229	FOXO3	T	G	0.6917	0.023	0.0035	4.98348e-11
Waist circumference	rs1928295		C	T	0.425	-0.018	0.0033	4.90983e-08
Waist circumference	rs1412235	LINGO2	C	G	0.3083	0.024	0.0035	7.02514e-12
Waist circumference	rs7903146	TCF7L2	T	C	0.25	-0.022	0.0036	9.89398e-10
Waist circumference	rs10786712	CYP17A1	T	C	0.3917	0.018	0.0033	4.90983e-08
Waist circumference	rs11039290	CELF1	A	G	0.3417	-0.022	0.0036	9.89398e-10
Waist circumference	rs10840100	TRIM66	G	A	0.725	0.019	0.0034	2.29389e-08
Waist circumference	rs1519480	BDNF-AS	T	C	0.6333	-0.03	0.0035	1.02209e-17
Waist circumference	rs7138803		A	G	0.4417	0.028	0.0034	1.79117e-16
Waist circumference	rs4883723		A	G	0.125	0.028	0.0046	1.15077e-09
Waist circumference	rs10132280		A	C	0.3333	-0.022	0.0035	3.2635e-10
Waist circumference	rs7144011	NRXN3	T	G	0.275	0.032	0.004	1.24419e-15
Waist circumference	rs2278076	SKOR1	A	G	0.1833	-0.024	0.0041	4.80875e-09
Waist circumference	rs2531992	ADCY9	G	A	0.8333	0.027	0.0045	1.97318e-09
Waist circumference	rs1421085	FTO	C	T	0.45	0.072	0.0034	1.57392e-99
Waist circumference	rs4788099	TUFM	G	A	0.3583	0.034	0.0033	6.8276e-25
Waist circumference	rs4985155	PDXDC1	G	A	0.3167	-0.019	0.0034	2.29389e-08
Waist circumference	rs749671	ZNF646	A	G	0.375	-0.02	0.0034	4.04475e-09
Waist circumference	rs6567160	RNU4-17P	C	T	0.2833	0.05	0.0039	1.25865e-37
Waist circumference	rs17066856	MC4R	C	T	0.1333	-0.035	0.0055	1.97032e-10
Waist circumference	rs7239883	LINC00907	A	G	0.6833	-0.019	0.0033	8.53305e-09
Waist circumference	rs17724992	PGPEP1	G	A	0.3083	-0.021	0.0038	3.27025e-08
Waist circumference	rs2287019	QPCTL	T	C	0.15	-0.033	0.0044	6.38178e-14
Waist circumference	rs16996700		C	T	0.3	-0.022	0.0036	9.89398e-10

## Sheet: Waist hip ratio
Phenotype	SNP	Nearest gene	effect allele	other allele	eaf	beta	se	p-value
WHR	rs10019888		A	G	0.8133	-0.0208	0.0023	8.05e-20
WHR	rs10049088		T	C	0.3814	-0.0271	0.0018	1.47e-53
WHR	rs10132280		A	C	0.3106	-0.0116	0.0018	3.11e-10
WHR	rs10164099	KIAA1328	T	C	0.8742	-0.0149	0.0025	1.17e-09
WHR	rs1017698	PNKD	A	G	0.5974	-0.0113	0.0018	5.13e-10
WHR	rs1035940		C	G	0.2762	0.012	0.002	1.47e-09
WHR	rs1045241	TNFAIP8	T	C	0.2816	-0.0123	0.0019	8.86e-11
WHR	rs1045411	HMGB1	T	C	0.2792	-0.0155	0.0019	1.27e-15
WHR	rs10475249		C	G	0.5488	0.0134	0.002	1.29e-11
WHR	rs10490869	ARPP21	A	T	0.7964	-0.0183	0.0022	9.34e-17
WHR	rs10499013		A	G	0.28	-0.0125	0.002	5.1e-10
WHR	rs10745659	CRADD	C	G	0.5607	-0.0127	0.0018	1.43e-12
WHR	rs10761785	REEP3	T	G	0.5135	-0.0147	0.0017	6.43e-18
WHR	rs10788569	CFL1P1	T	C	0.7235	-0.0134	0.0019	3.98e-12
WHR	rs10827252		A	G	0.4934	-0.0113	0.0018	2.03e-10
WHR	rs10842707		T	C	0.2036	0.0266	0.002	3.91e-39
WHR	rs10851523	ONECUT1	C	G	0.2742	-0.0118	0.002	1.79e-09
WHR	rs10876528		A	C	0.351	0.0236	0.0018	8.58e-39
WHR	rs10919388	HAUS4P1	A	C	0.2729	-0.0266	0.0019	6.4e-43
WHR	rs10923724		T	C	0.5565	0.024	0.0017	1.81e-45
WHR	rs10991433		T	C	0.8956	-0.0254	0.0028	5.73e-20
WHR	rs11030108	BDNF	A	G	0.3307	0.0154	0.0018	1.21e-17
WHR	rs11176015		T	C	0.293	0.0151	0.002	7.21e-14
WHR	rs11187537	FFAR4	C	G	0.2632	0.013	0.002	1.73e-10
WHR	rs1122080		A	G	0.2045	-0.0131	0.0022	1.6e-09
WHR	rs1124639		T	C	0.4392	-0.0113	0.0017	7.48e-11
WHR	rs1139653	DNAJA3	A	T	0.2851	0.0147	0.002	1.15e-13
WHR	rs1142	SRPK2	T	C	0.3344	0.0149	0.0018	2.06e-17
WHR	rs114760566		A	C	0.0432	0.0674	0.0048	2.94e-44
WHR	rs1158805	RIT2	A	C	0.3797	-0.0133	0.0018	4.95e-13
WHR	rs11654387		C	G	0.4878	0.0161	0.0018	1.45e-19
WHR	rs11724804	DGKQ	A	G	0.4436	-0.0165	0.0018	4.98e-20
WHR	rs11747001	HSPA4	A	G	0.7638	0.0154	0.002	8.39e-15
WHR	rs11764879	RSBN1L	A	G	0.2864	-0.0117	0.0019	3.93e-10
WHR	rs11897119	MEIS1	T	C	0.594	-0.0134	0.0017	4.07e-15
WHR	rs1190982	ARID4A	T	C	0.3027	0.0157	0.0019	5.1e-16
WHR	rs11992444		T	G	0.5085	0.0185	0.002	4.99e-21
WHR	rs12024554	MINOS1	T	C	0.2346	-0.0149	0.0023	1.08e-10
WHR	rs12042959	SDCCAG8	A	G	0.8633	0.0155	0.0025	9.25e-10
WHR	rs12101393	SLCO3A1	C	G	0.7865	0.014	0.0022	1.19e-10
WHR	rs12140153	INADL	T	G	0.091	-0.0214	0.0035	7.64e-10
WHR	rs12206094	FOXO3	T	C	0.2888	-0.0119	0.0019	2.21e-10
WHR	rs12287076	FAM180B	C	G	0.625	0.0192	0.002	3.53e-21
WHR	rs12430764	GPC6	A	G	0.5164	0.0107	0.0018	1.87e-09
WHR	rs1243188	MLLT10	T	C	0.7061	-0.0148	0.0019	2.37e-14
WHR	rs12440605	MAPKBP1	A	G	0.5243	0.0118	0.0018	4.02e-11
WHR	rs12449442		A	G	0.2186	0.0172	0.0021	2.55e-16
WHR	rs12459350	DOT1L	A	G	0.5423	0.0134	0.0017	2.23e-15
WHR	rs12469667	SCN2A	A	G	0.2322	-0.013	0.0021	2.82e-10
WHR	rs12494190	MECOM	A	G	0.4038	-0.0121	0.0018	3.03e-11
WHR	rs12495178	CADM2	T	C	0.6416	0.0124	0.0018	1.32e-12
WHR	rs12527712	BCKDHB	T	C	0.0882	0.0284	0.0033	3.38e-18
WHR	rs12575252	TRIM66	C	G	0.3337	-0.0154	0.0018	2.32e-18
WHR	rs12590238	TRAF3	C	G	0.8339	-0.0141	0.0023	1.55e-09
WHR	rs12593088	KIAA1199	A	G	0.3106	-0.0128	0.0019	5.16e-12
WHR	rs12608504	JUND	A	G	0.3593	0.0251	0.0018	4.68e-46
WHR	rs12684047	EPB41L4B	A	T	0.1914	-0.0185	0.0023	3.44e-15
WHR	rs12692387		T	C	0.3315	-0.0124	0.0021	2.9e-09
WHR	rs12777288	RNU6-709P	T	C	0.7714	-0.0139	0.0021	6.88e-11
WHR	rs12828016	WNK1	T	G	0.391	-0.0114	0.0018	4.08e-10
WHR	rs1294436		C	G	0.5972	0.023	0.002	1.29e-30
WHR	rs12986231	PGPEP1	T	C	0.7288	0.015	0.0022	2.04e-11
WHR	rs13063979	CPNE4	T	G	0.7323	-0.0135	0.0019	1.19e-12
WHR	rs13130484	PRKRIRP9	T	C	0.4294	0.0147	0.0017	7.83e-18
WHR	rs13229637		T	C	0.8538	0.0159	0.0025	1.91e-10
WHR	rs13256367	CASC8	A	C	0.6534	0.0141	0.0019	5.42e-14
WHR	rs1328757	PCK1	T	C	0.4743	0.0114	0.0018	1.69e-10
WHR	rs1345203		T	C	0.7829	0.0187	0.0024	3.07e-15
WHR	rs13642	MPPED2	A	T	0.6452	0.0113	0.0019	9.49e-10
WHR	rs1385167		A	G	0.862	-0.0224	0.0024	6.22e-20
WHR	rs1406948	UQCC1	A	G	0.3679	-0.0137	0.0017	4.12e-15
WHR	rs1431659	KCNB2	A	G	0.2736	0.0143	0.002	1.12e-12
WHR	rs1452075	CADPS	T	C	0.7316	0.0123	0.0019	1.32e-10
WHR	rs15285	LPL	T	C	0.2629	-0.0117	0.0019	1.62e-09
WHR	rs1534696	SNX10	A	C	0.5694	-0.0226	0.0017	3.67e-39
WHR	rs1563355		T	C	0.328	-0.0277	0.0019	1.59e-49
WHR	rs1569135		A	G	0.5372	0.0215	0.0017	2.76e-37
WHR	rs17101456		A	G	0.879	-0.0206	0.0028	7.46e-14
WHR	rs17109256	NRXN3	A	G	0.2324	0.0169	0.0021	2.4e-16
WHR	rs17324331	TRIP12	C	G	0.3136	0.012	0.0019	1.79e-10
WHR	rs17326656	LHCGR	T	G	0.2346	0.0153	0.0021	4.17e-13
WHR	rs17513613	CCNE1	T	C	0.6914	-0.0125	0.0018	5.42e-12
WHR	rs1757471	RPL23P11	T	C	0.5081	0.0128	0.0018	5.89e-13
WHR	rs17644283	RBPJ	A	G	0.3879	0.0148	0.0018	3.24e-17
WHR	rs17738166		A	G	0.3974	0.0114	0.0018	3.78e-10
WHR	rs1787013	CEP192	T	C	0.5586	-0.0108	0.0018	1.33e-09
WHR	rs1789882	ADH1B	A	G	0.1691	0.016	0.0023	9.97e-12
WHR	rs1800437	GIPR	C	G	0.1876	-0.0209	0.0022	6.23e-22
WHR	rs1805740	PHC1	T	G	0.7185	-0.0135	0.002	5.64e-12
WHR	rs1822489	MCC	A	G	0.3177	0.0122	0.0019	1.52e-10
WHR	rs1974004	ANKRD19P	T	C	0.1528	0.0173	0.0025	3.85e-12
WHR	rs2061708	COL11A1	C	G	0.5884	0.0152	0.002	2.13e-14
WHR	rs2112347	POC5	T	G	0.63	0.015	0.0017	8.41e-18
WHR	rs213624		A	G	0.5263	0.0118	0.0018	3.29e-11
WHR	rs2161097		T	C	0.4408	0.0126	0.0018	2.11e-12
WHR	rs2161228		T	C	0.102	0.0192	0.0029	4.32e-11
WHR	rs2167750	FAM13A	T	C	0.4729	0.0199	0.0018	6.47e-29
WHR	rs2183825	LINGO2	T	C	0.6861	-0.0141	0.0018	4.43e-15
WHR	rs2200155	RNU6-400P	A	G	0.3722	-0.0133	0.0018	5.07e-13
WHR	rs2236519	EYA2	A	G	0.3693	0.0212	0.0018	1.89e-30
WHR	rs2276390	DLAT	T	G	0.3375	-0.021	0.0019	5.76e-28
WHR	rs2291542	RNF123	T	C	0.3272	0.0168	0.0018	1.74e-20
WHR	rs2294239	ZNRF3	A	G	0.5683	0.02	0.0017	3.17e-31
WHR	rs2306589	ZNHIT3	T	C	0.473	0.016	0.0017	2.52e-21
WHR	rs2398893	PTPDC1	A	G	0.7143	0.0157	0.0019	9.01e-17
WHR	rs2455848	ANKRD28	T	C	0.3137	0.0128	0.0018	1.83e-12
WHR	rs2503099		A	G	0.8346	-0.0214	0.0023	8.3e-20
WHR	rs2526886	PCNX	T	G	0.69	0.0125	0.0021	3.65e-09
WHR	rs2613505	RPL31P12	T	C	0.8197	0.0161	0.0022	1.01e-13
WHR	rs2715135	GRB10	T	G	0.3706	0.0109	0.0018	4.09e-09
WHR	rs28446899		T	C	0.078	0.0362	0.0037	7.92e-23
WHR	rs28451064		A	G	0.1268	0.0177	0.003	4.23e-09
WHR	rs2903995	LACTBL1	A	T	0.3781	-0.0122	0.0018	1.61e-11
WHR	rs2925979	CMIP	T	C	0.2958	0.0215	0.0018	1.62e-31
WHR	rs3092781		T	C	0.451	-0.0145	0.0017	1.92e-17
WHR	rs332105		A	G	0.5544	-0.0139	0.0018	1.12e-14
WHR	rs35169799	PLCB3	T	C	0.0615	0.0373	0.0041	6.26e-20
WHR	rs36061954	FGFR1	T	C	0.3979	0.0146	0.002	3.42e-13
WHR	rs3736485		A	G	0.4564	0.0118	0.0017	3.85e-12
WHR	rs3786897	PEPD	A	G	0.5805	-0.0237	0.0017	1.45e-43
WHR	rs3825061	VPS11	T	C	0.387	0.0142	0.0018	5.45e-15
WHR	rs3891424		A	G	0.0527	-0.0278	0.0044	4e-10
WHR	rs3903399	CNTN2	T	C	0.7847	-0.0149	0.0022	6.82e-12
WHR	rs39312	WNT2	A	C	0.6205	-0.0154	0.0018	3.5e-18
WHR	rs3936510		T	G	0.1967	0.0241	0.0021	1.76e-29
WHR	rs409125	COBLL1	A	T	0.628	-0.0182	0.0018	2.08e-23
WHR	rs4239275		T	C	0.4129	0.0118	0.0018	3.26e-11
WHR	rs429358	APOE	T	C	0.8459	0.0346	0.0027	4.21e-37
WHR	rs4372913	SLC35F5	A	G	0.7875	-0.014	0.0022	8.6e-11
WHR	rs4395620		T	C	0.5756	0.0106	0.0018	3.57e-09
WHR	rs4454042	SGCD	T	C	0.2734	0.0127	0.002	1.37e-10
WHR	rs4671193		T	C	0.3562	-0.0191	0.0018	4.79e-25
WHR	rs4779526	KLF13	A	T	0.7568	0.0132	0.0021	2.09e-10
WHR	rs4788204	TAOK2	A	G	0.4594	0.0169	0.0018	2.64e-21
WHR	rs4851284	LONRF2	T	C	0.6685	-0.0151	0.0021	5.62e-13
WHR	rs4894803	FNDC3B	A	G	0.6004	0.0149	0.0018	3.74e-16
WHR	rs494752	DYM	C	G	0.6548	-0.0154	0.0019	2.31e-16
WHR	rs4964656	WSCD2	C	G	0.3026	-0.0181	0.002	1.96e-20
WHR	rs536665	DLG2	A	G	0.7979	-0.0171	0.0024	2.18e-12
WHR	rs55747707	MLXIPL	A	G	0.1765	-0.0154	0.0023	3.4e-11
WHR	rs55920843	ACVR1C	T	G	0.9886	0.0623	0.0092	1.55e-11
WHR	rs579682	MIRLET7A2	T	C	0.7141	-0.0133	0.002	2.02e-11
WHR	rs591939		A	G	0.7547	-0.0177	0.0023	9.11e-15
WHR	rs6021889		A	G	0.7102	0.0203	0.0019	2.46e-27
WHR	rs605066		T	C	0.5834	-0.0192	0.0018	2.38e-26
WHR	rs6130360		A	G	0.8485	0.0151	0.0025	1.13e-09
WHR	rs62095889	C18orf8	A	G	0.3426	-0.0166	0.0021	1.62e-15
WHR	rs62506196	RNA5SP267	A	C	0.8376	-0.0159	0.0027	2.7e-09
WHR	rs645040		T	G	0.7704	0.0156	0.002	1.15e-14
WHR	rs6474945	CCDC171	T	G	0.4535	-0.0101	0.0017	2.67e-09
WHR	rs6545714		A	G	0.6107	-0.0139	0.0017	8.96e-16
WHR	rs6566233		T	C	0.5152	-0.0128	0.002	7.13e-11
WHR	rs6567160	RNU4-17P	T	C	0.7532	-0.0263	0.002	2.53e-39
WHR	rs6604731	ACTBP11	T	C	0.2997	-0.0116	0.0019	2.55e-09
WHR	rs6658723	FAM212B	T	C	0.4332	0.0145	0.002	2.34e-13
WHR	rs6688233		T	C	0.2394	0.0186	0.0021	3.02e-19
WHR	rs668871	SLC22A3	T	C	0.469	-0.0134	0.002	7.19e-12
WHR	rs6699397	BARHL2	A	G	0.6236	-0.0118	0.0017	1.28e-11
WHR	rs6743060		A	C	0.8423	0.0266	0.0022	1.8e-32
WHR	rs6749646	DNAJC27	A	T	0.7801	-0.021	0.0022	5.99e-22
WHR	rs6795831		A	C	0.8143	0.0288	0.0023	2.09e-37
WHR	rs6905288		A	G	0.5735	0.0327	0.0017	2.02e-78
WHR	rs6942652	CPED1	C	G	0.4294	-0.0126	0.0018	2.18e-12
WHR	rs7025089	MED27	A	C	0.6792	-0.0118	0.0019	4.29e-10
WHR	rs7070670	ANK3	T	C	0.3228	-0.0132	0.0021	3.64e-10
WHR	rs711869		A	G	0.5566	-0.0171	0.0018	2.38e-21
WHR	rs7138803		A	G	0.3842	0.0125	0.0018	1.09e-12
WHR	rs7206608	CDH13	C	G	0.6754	-0.0127	0.0019	2.48e-11
WHR	rs7213608	KCNJ12	T	C	0.6826	-0.0171	0.0019	6.95e-19
WHR	rs7217226		T	G	0.6555	-0.0137	0.0018	9.94e-15
WHR	rs72959041	RSPO3	A	G	0.0409	0.126	0.0044	4.56e-183
WHR	rs7311622	RNU4-41P	T	C	0.4526	-0.0119	0.0018	2.96e-11
WHR	rs733381	TNRC6B	A	G	0.7717	0.0122	0.0021	2.82e-09
WHR	rs7395513		A	G	0.4389	-0.0173	0.002	2.46e-18
WHR	rs747249	ADAMTS8	A	G	0.3588	0.0111	0.0019	2.65e-09
WHR	rs747601	ARNTL	A	T	0.275	-0.0128	0.002	7.27e-11
WHR	rs7492628	C14orf159	C	G	0.6801	-0.0125	0.0019	7.89e-11
WHR	rs7498665	SH2B1	A	G	0.6175	-0.0168	0.0017	1.13e-22
WHR	rs7591387	THADA	T	C	0.1024	0.0179	0.0028	9.3e-11
WHR	rs7599312	ERBB4	A	G	0.2732	-0.0114	0.0019	2.36e-09
WHR	rs7647305	DGKG	T	C	0.2099	-0.0142	0.0021	8.28e-12
WHR	rs76699125	ADAMTS9-AS2	T	C	0.9368	0.032	0.0041	4.96e-15
WHR	rs7744833	CDKAL1	A	G	0.6823	0.0125	0.0019	6.88e-11
WHR	rs780159	ZMIZ1	A	G	0.4292	-0.0133	0.0017	2.86e-14
WHR	rs789351		T	C	0.4202	0.0123	0.0017	7.57e-13
WHR	rs7907173		A	G	0.4511	-0.0109	0.0018	9.43e-10
WHR	rs793456		A	G	0.6045	-0.0106	0.0018	3.56e-09
WHR	rs797486	DLEU1	A	C	0.8938	0.0316	0.0026	1.09e-34
WHR	rs8043060	IQCH	A	G	0.2217	-0.0166	0.002	8.93e-17
WHR	rs805768		T	C	0.2391	0.0137	0.0023	3.63e-09
WHR	rs8070737	ZZEF1	T	G	0.1682	0.016	0.0023	7.39e-12
WHR	rs8071778		C	G	0.1539	-0.016	0.0025	6.62e-11
WHR	rs809955	MAML3	A	G	0.3669	-0.0155	0.002	2.48e-14
WHR	rs8141715	TBC1D22A	T	G	0.7545	-0.0136	0.002	1.45e-11
WHR	rs861029	SRD5A3-AS1	T	C	0.7492	-0.0135	0.002	4.36e-11
WHR	rs863750	FAM101A	T	C	0.5836	0.0259	0.0017	6.2e-51
WHR	rs889398	NFAT5	T	C	0.4146	-0.0171	0.0017	1.99e-23
WHR	rs901630		T	C	0.411	-0.0119	0.0017	6.81e-12
WHR	rs905938	DCST2	T	C	0.7235	0.0126	0.0019	7.83e-11
WHR	rs9296938		A	G	0.2501	-0.0145	0.002	1.5e-12
WHR	rs9370243		T	G	0.0804	0.0198	0.0032	1.13e-09
WHR	rs946106	AGBL4-IT1	T	C	0.7664	-0.017	0.002	2.72e-17
WHR	rs9515201	COL4A2	A	C	0.3068	-0.0121	0.0018	6.63e-11
WHR	rs9644033		A	T	0.7545	0.0188	0.0021	2.1e-19
WHR	rs979012		T	C	0.3637	0.0116	0.0018	7.86e-11
WHR	rs9878908	GSTM5P1	T	C	0.8126	-0.0193	0.0021	3.38e-20
WHR	rs9923544	FTO	T	C	0.4354	0.0389	0.0017	1.18e-113
WHR	rs9976841	DSCR4	A	G	0.3871	-0.0129	0.0018	2.1e-12
WHR	rs998732		A	G	0.8343	0.0165	0.0023	1.04e-12

## Sheet: Type 2 Diabetes
Phenotype	SNP	Nearest gene	effect allele	other allele	eaf	beta	se	p-value
Type 2 diabetes	rs10101067		G	C	0.9141	-0.0391	0.0069	1.28e-08
Type 2 diabetes	rs10119430	EPB41L4B	G	A	0.2209	0.0279	0.0046	1.76e-09
Type 2 diabetes	rs10159026		C	T	0.7491	0.0273	0.0046	2.04e-09
Type 2 diabetes	rs10184004	GRB14	C	T	0.5951	0.0636	0.0041	4.39e-54
Type 2 diabetes	rs10188334		C	T	0.8409	0.0544	0.0053	2.47e-24
Type 2 diabetes	rs10404726	CRTC1	C	T	0.4829	0.0255	0.0042	1.36e-09
Type 2 diabetes	rs10440833	CDKAL1	T	A	0.7028	-0.1286	0.0041	1e-200
Type 2 diabetes	rs10469860		G	A	0.2755	-0.0238	0.0043	3.84e-08
Type 2 diabetes	rs10750397		G	A	0.7146	-0.04	0.0042	1.74e-21
Type 2 diabetes	rs1075855		G	C	0.2791	0.0263	0.0045	3.53e-09
Type 2 diabetes	rs10767659	BDNF	G	T	0.3538	0.026	0.0042	4.56e-10
Type 2 diabetes	rs10808671	NDUFAF6	G	A	0.5407	-0.0358	0.0038	2.37e-21
Type 2 diabetes	rs10811661		C	T	0.2442	-0.1471	0.0048	1e-200
Type 2 diabetes	rs10818763	ZBTB26	C	T	0.676	0.0358	0.0051	2.41e-12
Type 2 diabetes	rs10830963	MTNR1B	G	C	0.3057	0.0731	0.0042	1.29e-66
Type 2 diabetes	rs10879261	TSPAN8	G	T	0.388	0.0341	0.0038	6.81e-19
Type 2 diabetes	rs10916780	LINC01141	G	A	0.2476	-0.0342	0.0046	1.58e-13
Type 2 diabetes	rs10937721	WFS1	G	C	0.3904	-0.0755	0.0043	7.2e-70
Type 2 diabetes	rs10938398	PRKRIRP9	G	A	0.6065	-0.0445	0.0039	1.49e-30
Type 2 diabetes	rs10993072		C	T	0.6647	-0.0315	0.0041	2.93e-14
Type 2 diabetes	rs10998338	TET1	G	A	0.5189	-0.0308	0.0039	1.31e-15
Type 2 diabetes	rs11048457		G	A	0.3857	0.0385	0.0043	2.2e-19
Type 2 diabetes	rs1109442	MYO19	C	T	0.4629	0.0218	0.0037	6.11e-09
Type 2 diabetes	rs11108094	USP44	C	A	0.9339	-0.0571	0.0088	1.08e-10
Type 2 diabetes	rs1111875		C	T	0.549	0.0928	0.0038	1.44e-128
Type 2 diabetes	rs11150745	RPTOR	G	A	0.3173	-0.0312	0.0053	5.17e-09
Type 2 diabetes	rs11173646		T	A	0.7362	-0.0285	0.0047	1.45e-09
Type 2 diabetes	rs111765639	JMJD1C	G	A	0.876	0.0581	0.0084	5.37e-12
Type 2 diabetes	rs11199116	SEC23IP	C	A	0.1909	0.0306	0.005	1.01e-09
Type 2 diabetes	rs11201992	GRID1	C	A	0.4767	0.0251	0.0038	5.76e-11
Type 2 diabetes	rs112324411	MEG3	C	T	0.9377	0.0729	0.0103	1.42e-12
Type 2 diabetes	rs11236524	DGAT2	C	T	0.2408	0.0363	0.0064	1.13e-08
Type 2 diabetes	rs11257655	RN7SL232P	C	T	0.7044	-0.0946	0.0056	1.44e-63
Type 2 diabetes	rs11258422	BEND7	C	A	0.4091	0.0241	0.0041	3.18e-09
Type 2 diabetes	rs1127215	PTGFRN	C	T	0.6041	0.0412	0.0039	1.81e-26
Type 2 diabetes	rs113414093	CRYBA2	G	A	0.9459	-0.0724	0.0128	1.68e-08
Type 2 diabetes	rs114136102		C	T	0.0384	0.0631	0.0114	2.81e-08
Type 2 diabetes	rs11583755	KLHL21	C	A	0.3287	0.0369	0.0041	1.31e-19
Type 2 diabetes	rs11602873	ARAP1	T	A	0.1459	-0.0987	0.0059	1.98e-62
Type 2 diabetes	rs11614914	FBRSL1	C	T	0.7033	-0.0394	0.0044	2.64e-19
Type 2 diabetes	rs11616380	SPRY2	G	T	0.7299	0.0764	0.0043	1.02e-69
Type 2 diabetes	rs11646052	GINS2	G	A	0.4116	0.026	0.0039	2.66e-11
Type 2 diabetes	rs11651755	HNF1B	C	T	0.4671	0.0663	0.0038	8.61e-67
Type 2 diabetes	rs11708067	ADCY5	G	A	0.2229	-0.0804	0.005	1.63e-57
Type 2 diabetes	rs117316450	COPB1	G	C	0.0183	0.1328	0.0171	9.46e-15
Type 2 diabetes	rs11759026	MIR588	G	A	0.3164	0.0585	0.0057	1.17e-24
Type 2 diabetes	rs117642733	KCNJ12	C	T	0.9584	-0.0762	0.0133	9.45e-09
Type 2 diabetes	rs11870735	VPS53	C	T	0.824	-0.0314	0.0054	7.58e-09
Type 2 diabetes	rs12001437		C	T	0.4071	0.0301	0.0038	4.38e-15
Type 2 diabetes	rs12056338		G	T	0.6086	-0.0251	0.004	2.18e-10
Type 2 diabetes	rs12380322	HAUS6	G	A	0.3922	0.0295	0.004	1.64e-13
Type 2 diabetes	rs12419690	CRY2	G	A	0.5115	0.0298	0.004	1.39e-13
Type 2 diabetes	rs12505942	MAML3	C	T	0.3133	-0.0294	0.0042	1.83e-12
Type 2 diabetes	rs1260326	GCKR	C	T	0.5805	0.0625	0.0039	2.16e-57
Type 2 diabetes	rs12603589	BPTF	C	T	0.3128	0.0421	0.0046	1.06e-19
Type 2 diabetes	rs12625671	HNF4A	C	T	0.2326	0.0603	0.0055	6.08e-28
Type 2 diabetes	rs12746673		C	A	0.2076	0.0308	0.0049	3.3e-10
Type 2 diabetes	rs12789028	LTBP3	G	A	0.8198	-0.0459	0.005	3.9e-20
Type 2 diabetes	rs12883788	NPAS3	C	T	0.5887	-0.0327	0.004	2.82e-16
Type 2 diabetes	rs12910361		G	A	0.614	0.0686	0.004	5.19e-65
Type 2 diabetes	rs12918782	LMF1	G	A	0.2568	0.0308	0.0047	4.57e-11
Type 2 diabetes	rs12986742	LINC01122	C	T	0.4727	0.0353	0.0038	5.53e-21
Type 2 diabetes	rs13059382	CASR	G	T	0.7216	0.0356	0.0059	1.4e-09
Type 2 diabetes	rs13094957	UBE2E2	C	T	0.2196	-0.0637	0.0047	2.35e-42
Type 2 diabetes	rs13099581	EGFEM1P	C	T	0.8192	0.0371	0.0058	1.28e-10
Type 2 diabetes	rs13237518	TMEM106B	C	A	0.5207	-0.0283	0.0038	1.99e-13
Type 2 diabetes	rs13262861	NKX6-3	C	A	0.8326	0.1021	0.0054	8.2e-79
Type 2 diabetes	rs13266634	SLC30A8	C	T	0.6814	0.1024	0.0041	4.23e-136
Type 2 diabetes	rs13268508	HSF1	C	T	0.6277	-0.0376	0.0041	4.07e-20
Type 2 diabetes	rs13406280	GALNT3	C	T	0.566	0.0269	0.0039	5.66e-12
Type 2 diabetes	rs13415288	SPHKAP	C	T	0.3654	0.0262	0.004	9.16e-11
Type 2 diabetes	rs13434089	ATXN7	C	T	0.2034	-0.0607	0.0052	4.45e-31
Type 2 diabetes	rs138771	TOM1	G	A	0.6895	-0.0259	0.0044	3.78e-09
Type 2 diabetes	rs1412234	LINGO2	C	T	0.2864	0.0397	0.0042	4.42e-21
Type 2 diabetes	rs1421085	FTO	C	T	0.367	0.1182	0.004	1.29e-189
Type 2 diabetes	rs1426371	WSCD2	G	A	0.692	0.0429	0.0045	1.29e-21
Type 2 diabetes	rs1431819	COL27A1	G	A	0.7075	0.0294	0.0046	1.99e-10
Type 2 diabetes	rs144052331		C	T	0.0539	-0.0709	0.0098	3.97e-13
Type 2 diabetes	rs145904381	BNIPL	C	T	0.0104	-0.1607	0.0221	4.01e-13
Type 2 diabetes	rs146716733	ARID5B	C	T	0.9213	0.0451	0.0079	1.24e-08
Type 2 diabetes	rs1470560	ARPP21	G	A	0.6433	-0.0245	0.004	1.22e-09
Type 2 diabetes	rs149336329	MYO5C	G	T	0.9566	0.0869	0.01	2.86e-18
Type 2 diabetes	rs1561927		C	T	0.31	0.0332	0.0046	4.97e-13
Type 2 diabetes	rs1567353	DMRT2	G	C	0.3612	0.0278	0.004	7.06e-12
Type 2 diabetes	rs1650505		G	A	0.7722	-0.0409	0.0045	1.69e-19
Type 2 diabetes	rs17036160	PPARG	C	T	0.8874	0.1007	0.0065	1.54e-53
Type 2 diabetes	rs174541	FADS2	T	C	0.3493	0.0277	0.0041	2.39e-11
Type 2 diabetes	rs17772814	CASC11	G	A	0.917	0.0685	0.0124	3.38e-08
Type 2 diabetes	rs187653072	DNAJC2	C	T	0.0271	0.0967	0.0138	2.22e-12
Type 2 diabetes	rs197374	FAM212B-AS1	C	T	0.5929	-0.0224	0.0039	7.76e-09
Type 2 diabetes	rs1996617		C	T	0.3914	0.0289	0.004	6.54e-13
Type 2 diabetes	rs2032217	CDH7	G	A	0.6671	-0.0268	0.004	2.7e-11
Type 2 diabetes	rs2115107		G	A	0.5948	-0.0357	0.0039	2.26e-20
Type 2 diabetes	rs2169033	LCORL	C	T	0.34	-0.0325	0.0041	1.42e-15
Type 2 diabetes	rs217256	WNT8A	C	T	0.4926	0.021	0.0037	1.36e-08
Type 2 diabetes	rs2188848	TPT1P7	G	A	0.2109	-0.0325	0.0048	1.17e-11
Type 2 diabetes	rs2237897	KCNQ1	C	T	0.7624	0.2199	0.0068	1e-200
Type 2 diabetes	rs2240716	ARVCF	C	T	0.7069	-0.0262	0.0042	4.83e-10
Type 2 diabetes	rs2257883	RPSAP52	G	A	0.7363	-0.071	0.0049	3.86e-47
Type 2 diabetes	rs2269247	PGM1	C	T	0.8094	0.0356	0.0049	3.4e-13
Type 2 diabetes	rs2408252		C	T	0.5375	-0.0264	0.0043	1.06e-09
Type 2 diabetes	rs242105	ACTN1-AS1	C	A	0.4085	0.039	0.0059	3.58e-11
Type 2 diabetes	rs2482506	RNU6-1231P	C	G	0.2389	0.0316	0.0045	2.26e-12
Type 2 diabetes	rs2513505	C11orf30	A	C	0.4068	0.024	0.0038	4.1e-10
Type 2 diabetes	rs2591392	JMY	G	A	0.6247	0.0306	0.0039	1.89e-15
Type 2 diabetes	rs2613499	NEGR1	G	A	0.199	-0.0363	0.0053	1.04e-11
Type 2 diabetes	rs2662390	RAB3C	C	T	0.7419	-0.0276	0.0048	1.03e-08
Type 2 diabetes	rs2723065	CEP68	G	A	0.3817	-0.0422	0.0039	7.19e-28
Type 2 diabetes	rs2725370		C	T	0.7126	-0.0319	0.0046	3.3e-12
Type 2 diabetes	rs2730827		T	C	0.5145	0.0279	0.0038	2.1e-13
Type 2 diabetes	rs2796441		G	A	0.5596	0.0609	0.0039	2.92e-55
Type 2 diabetes	rs2816177		G	A	0.3994	0.0224	0.0039	6.82e-09
Type 2 diabetes	rs28408270		G	T	0.4896	0.0239	0.0039	1.07e-09
Type 2 diabetes	rs28642213	GPSM1	G	A	0.7572	0.0822	0.0047	5.71e-68
Type 2 diabetes	rs28758542		G	A	0.3408	-0.0256	0.0042	1.67e-09
Type 2 diabetes	rs2876354	RPL35AP3	C	T	0.5168	0.0465	0.0038	1.43e-34
Type 2 diabetes	rs28792187	STAU2	G	A	0.0729	0.0414	0.0076	4.13e-08
Type 2 diabetes	rs2943650		C	T	0.3616	-0.0805	0.0042	1.9e-81
Type 2 diabetes	rs303760	C18orf8	C	T	0.6887	-0.0334	0.0044	2.04e-14
Type 2 diabetes	rs305686	KCNH7	C	T	0.6267	0.0294	0.0053	2.29e-08
Type 2 diabetes	rs3122231		C	T	0.6586	0.0271	0.0044	5.8e-10
Type 2 diabetes	rs3130931		C	T	0.6765	0.0482	0.0041	2.34e-32
Type 2 diabetes	rs314879	DDX39AP1	C	T	0.2288	0.0364	0.0046	2.84e-15
Type 2 diabetes	rs329118	JADE2	C	T	0.5849	-0.0281	0.0038	2e-13
Type 2 diabetes	rs340874	PROX1-AS1	C	T	0.4991	0.0543	0.0039	6.47e-45
Type 2 diabetes	rs34506349	AFF3	G	A	0.9609	0.0665	0.0116	1.04e-08
Type 2 diabetes	rs34584161	RNF6	G	A	0.2837	-0.0565	0.0044	1.62e-37
Type 2 diabetes	rs348330	ABCB10	G	A	0.4544	0.0497	0.0054	2.81e-20
Type 2 diabetes	rs35011184	TCF7L2	G	A	0.7797	-0.2508	0.005	1e-200
Type 2 diabetes	rs35753840	SGCZ	C	A	0.34	0.0254	0.0042	9.65e-10
Type 2 diabetes	rs35895680	GIP	C	A	0.7066	0.0499	0.0047	8.41e-27
Type 2 diabetes	rs3744347	CBX1	G	A	0.253	-0.0301	0.0046	4.76e-11
Type 2 diabetes	rs3747207	PNPLA3	G	A	0.7178	-0.0412	0.0044	3.69e-21
Type 2 diabetes	rs3751239	RN7SKP15	G	C	0.2193	-0.0687	0.0047	1.95e-47
Type 2 diabetes	rs3753693	YTHDF2	C	T	0.549	0.0255	0.004	1.11e-10
Type 2 diabetes	rs3798519	TFAP2B	C	A	0.2086	0.0474	0.0047	5.6e-24
Type 2 diabetes	rs3828242	ERBB4	G	A	0.2696	-0.0252	0.0043	6.5e-09
Type 2 diabetes	rs3872707	SETD5	G	A	0.844	-0.037	0.0054	9.76e-12
Type 2 diabetes	rs3887059		G	A	0.7364	-0.0295	0.0043	5.12e-12
Type 2 diabetes	rs410150	LINC00907	C	T	0.2139	0.0289	0.0048	1.23e-09
Type 2 diabetes	rs4129858	LAMC1	G	A	0.4167	0.0223	0.0038	4.38e-09
Type 2 diabetes	rs41304257	IPO9	G	A	0.2441	-0.0318	0.0047	8.48e-12
Type 2 diabetes	rs4252505	TRPV5	G	A	0.1846	0.0413	0.007	4.52e-09
Type 2 diabetes	rs429358	APOE	C	T	0.1469	-0.0585	0.0055	1.9e-26
Type 2 diabetes	rs4343858	NSD1	G	A	0.7216	0.0295	0.0045	5.38e-11
Type 2 diabetes	rs4440243	ART3	C	T	0.4217	-0.0246	0.0043	9.95e-09
Type 2 diabetes	rs4482463	PARD3B	C	A	0.2443	0.0316	0.0056	1.82e-08
Type 2 diabetes	rs464605		C	T	0.3465	-0.07	0.0041	8.04e-66
Type 2 diabetes	rs4671799	ETAA1	G	A	0.6669	-0.0262	0.004	5.29e-11
Type 2 diabetes	rs4673712		C	T	0.2897	-0.0269	0.0045	1.65e-09
Type 2 diabetes	rs4709746		C	T	0.866	0.0565	0.0059	1.52e-21
Type 2 diabetes	rs4777857		G	A	0.4391	0.0255	0.0039	4.81e-11
Type 2 diabetes	rs4805881	PEPD	C	A	0.6207	-0.0379	0.0039	8.44e-22
Type 2 diabetes	rs4810145	GNAS-AS1	C	T	0.5221	0.0303	0.0038	1.05e-15
Type 2 diabetes	rs4832290	KDM3A	C	T	0.7645	-0.0267	0.0049	3.94e-08
Type 2 diabetes	rs4833687	PRDM5	C	T	0.7415	-0.0267	0.0045	2.76e-09
Type 2 diabetes	rs4834232	LARP1B	C	T	0.787	-0.0272	0.0047	9.42e-09
Type 2 diabetes	rs4865796	ARL15	G	A	0.2906	-0.0481	0.0042	5.43e-30
Type 2 diabetes	rs4902002	MNAT1	G	A	0.3474	0.0246	0.0041	1.37e-09
Type 2 diabetes	rs4906272	TRAF3	C	T	0.7332	-0.0299	0.0046	5.21e-11
Type 2 diabetes	rs4923864	C15orf52	G	A	0.6905	0.0568	0.0061	1.69e-20
Type 2 diabetes	rs4929965	MIR4686	G	A	0.6147	-0.0676	0.0042	5.07e-57
Type 2 diabetes	rs501470	SLC22A3	G	T	0.4559	-0.032	0.0038	1.62e-17
Type 2 diabetes	rs529565		C	T	0.3648	0.0415	0.0039	8.04e-27
Type 2 diabetes	rs529623	FXYD2	C	T	0.4961	-0.0224	0.0038	4.26e-09
Type 2 diabetes	rs539515	SEC16B	C	A	0.2066	0.0358	0.0046	5.4e-15
Type 2 diabetes	rs55691245	ACSL1	G	A	0.8671	0.0561	0.0064	1.77e-18
Type 2 diabetes	rs55857387		C	T	0.2537	-0.0441	0.0046	1.74e-21
Type 2 diabetes	rs56243018	ZBTB38	C	A	0.046	-0.0833	0.0104	8.89e-16
Type 2 diabetes	rs56348580	HNF1A	G	C	0.7058	0.0507	0.0047	1.48e-27
Type 2 diabetes	rs56392746		G	A	0.9169	0.0579	0.0076	3.45e-14
Type 2 diabetes	rs57767539	ERN1	G	A	0.9362	-0.0622	0.0091	7.24e-12
Type 2 diabetes	rs58542926		C	T	0.9258	-0.0721	0.0072	1.62e-23
Type 2 diabetes	rs59489841	NLGN1	C	T	0.7015	0.0235	0.0042	3.15e-08
Type 2 diabetes	rs59646751	IGF1R	G	T	0.6929	-0.0241	0.0041	3.36e-09
Type 2 diabetes	rs6011155	ZBTB46	C	T	0.4137	-0.0284	0.0039	5.85e-13
Type 2 diabetes	rs6021276	NFATC2	C	T	0.6262	-0.0283	0.004	2.24e-12
Type 2 diabetes	rs60251368	BRAF	G	A	0.0681	0.0549	0.0078	2.18e-12
Type 2 diabetes	rs60384372	MSRA	G	A	0.4504	-0.0352	0.0042	4.32e-17
Type 2 diabetes	rs6059662	RALY	G	A	0.6963	0.0369	0.0043	2.07e-17
Type 2 diabetes	rs6066138	EYA2	G	A	0.7376	0.042	0.0047	6.3e-19
Type 2 diabetes	rs6137042	STK35	G	A	0.697	0.0263	0.0047	2.33e-08
Type 2 diabetes	rs61779284	MACF1	G	A	0.7976	-0.0703	0.0048	1.42e-48
Type 2 diabetes	rs61817176	SRGAP2	C	A	0.4527	-0.0263	0.004	3.59e-11
Type 2 diabetes	rs61967710	HS6ST3	G	A	0.9413	-0.0554	0.0099	2.52e-08
Type 2 diabetes	rs62618693	QSER1	C	T	0.9582	0.0819	0.0111	1.41e-13
Type 2 diabetes	rs6538805	RMST	C	T	0.4736	-0.0303	0.0039	1.45e-14
Type 2 diabetes	rs6549112		G	T	0.3328	-0.0268	0.004	1.59e-11
Type 2 diabetes	rs6565922	ZNF236	C	T	0.5752	-0.0279	0.0039	6.18e-13
Type 2 diabetes	rs6567160	RNU4-17P	C	T	0.2362	0.0539	0.0044	7.51e-34
Type 2 diabetes	rs667920	STAG1	G	T	0.2332	-0.0324	0.0045	5.83e-13
Type 2 diabetes	rs6712905	DNAH7	C	T	0.3181	0.0279	0.0042	2.07e-11
Type 2 diabetes	rs6714523		G	A	0.8807	-0.0401	0.0061	6.29e-11
Type 2 diabetes	rs6716394		G	A	0.4844	0.0275	0.0037	1.46e-13
Type 2 diabetes	rs67269808	CHCHD2P9	G	A	0.0722	-0.0731	0.0078	1.03e-20
Type 2 diabetes	rs6741676		G	A	0.3067	-0.0324	0.0042	6.52e-15
Type 2 diabetes	rs6777684		G	A	0.6279	0.0548	0.0044	1.54e-35
Type 2 diabetes	rs6792892	RBM6	C	T	0.4822	0.0306	0.004	1.36e-14
Type 2 diabetes	rs6813195		C	T	0.6486	0.0463	0.004	7.65e-31
Type 2 diabetes	rs6870983	TMEM161B-AS1	C	T	0.7415	0.0287	0.0049	6.32e-09
Type 2 diabetes	rs6885157	MGAT1	G	T	0.7828	0.0372	0.0068	4.71e-08
Type 2 diabetes	rs6946660	UBE3C	C	T	0.4145	-0.0472	0.0039	3.32e-33
Type 2 diabetes	rs6956980	STEAP2	C	T	0.4669	0.0284	0.0038	9.55e-14
Type 2 diabetes	rs697239	ZMIZ1	C	T	0.4453	-0.0587	0.0038	4.77e-54
Type 2 diabetes	rs6975279	AUTS2	C	A	0.7117	-0.0431	0.0042	4.09e-25
Type 2 diabetes	rs6976111	CTTNBP2	C	A	0.7218	-0.0258	0.0046	1.51e-08
Type 2 diabetes	rs7029718	SUMO2P2	G	A	0.596	-0.0273	0.0039	1.47e-12
Type 2 diabetes	rs7132908	FAIM2	A	G	0.6431	0.0297	0.004	7.44e-14
Type 2 diabetes	rs7147483		C	T	0.3364	-0.0352	0.0041	9.41e-18
Type 2 diabetes	rs71495046		C	A	0.121	0.0399	0.0063	1.86e-10
Type 2 diabetes	rs7156625	NRXN3	G	A	0.7662	-0.053	0.0049	5.35e-27
Type 2 diabetes	rs7163757	NPM1P47	C	T	0.5556	0.043	0.0038	6.08e-30
Type 2 diabetes	rs7178762	USP3-AS1	C	T	0.4889	0.0323	0.0041	1.79e-15
Type 2 diabetes	rs7224711	CYTH1	C	T	0.5196	0.0307	0.0038	1.23e-15
Type 2 diabetes	rs7227272	RNU6-706P	G	A	0.8229	0.0408	0.0056	4.69e-13
Type 2 diabetes	rs723355		G	A	0.5624	0.0237	0.0039	1.99e-09
Type 2 diabetes	rs7240767	LAMA1	C	T	0.4776	0.034	0.0051	2.05e-11
Type 2 diabetes	rs7274134		C	T	0.6695	0.0247	0.0041	2.28e-09
Type 2 diabetes	rs72802365	CTRB2	G	C	0.928	0.1074	0.008	1.1e-40
Type 2 diabetes	rs730497	GCK	G	A	0.8275	-0.0552	0.005	9.31e-29
Type 2 diabetes	rs730831	CTBP1	G	T	0.1945	-0.0878	0.0072	4.81e-34
Type 2 diabetes	rs73121277	DDC	C	T	0.2966	0.026	0.0042	7.4e-10
Type 2 diabetes	rs73184014	LHFPL3	G	A	0.2094	-0.0298	0.0052	1.17e-08
Type 2 diabetes	rs7483027	OR5B17	C	T	0.3277	-0.0267	0.0041	5.61e-11
Type 2 diabetes	rs75080135		C	A	0.2074	-0.0357	0.0049	2.4e-13
Type 2 diabetes	rs75307421	DEPDC5	G	A	0.9687	-0.0737	0.0132	2.6e-08
Type 2 diabetes	rs75432112		G	A	0.9536	-0.1319	0.0104	6.41e-37
Type 2 diabetes	rs7546252	PIGC	G	A	0.5727	-0.0262	0.0041	2e-10
Type 2 diabetes	rs7554251	MTOR	C	T	0.7016	0.0297	0.0045	2.86e-11
Type 2 diabetes	rs75619936	RFX3	G	C	0.1329	0.0314	0.0056	2.42e-08
Type 2 diabetes	rs757110	ABCC8	C	A	0.3704	0.0599	0.0039	4.59e-52
Type 2 diabetes	rs7633673	MBNL1	G	A	0.5904	0.0306	0.0038	8.21e-16
Type 2 diabetes	rs7659468	SLC9B1	G	T	0.4984	-0.0287	0.0037	1.43e-14
Type 2 diabetes	rs7664347	SLIT2	C	T	0.6601	-0.0234	0.0041	9.52e-09
Type 2 diabetes	rs76675804	THADA	C	T	0.0941	-0.1208	0.0074	1.29e-59
Type 2 diabetes	rs7674402	MOB1B	G	A	0.7719	-0.0523	0.0064	3.98e-16
Type 2 diabetes	rs76895963	CCND2-AS1	G	T	0.019	-0.4223	0.0202	1.2e-96
Type 2 diabetes	rs7732130	ZBED3-AS1	G	A	0.2954	0.0554	0.0047	2.21e-32
Type 2 diabetes	rs7742292	NHSL1	C	T	0.4778	0.0261	0.004	5.06e-11
Type 2 diabetes	rs7752666	BEND3	C	T	0.7047	0.0305	0.0043	1.66e-12
Type 2 diabetes	rs79090772	FAF1	C	T	0.0971	-0.0728	0.0066	1.3e-28
Type 2 diabetes	rs79310463	KSR2	C	T	0.8257	-0.05	0.0053	7.21e-21
Type 2 diabetes	rs8010382	SMEK1	G	A	0.4692	0.0266	0.0038	3.02e-12
Type 2 diabetes	rs80196932	NUS1	C	T	0.1828	-0.0479	0.0053	9.73e-20
Type 2 diabetes	rs8043085	RASGRP1	G	T	0.6975	-0.0407	0.0042	9.06e-22
Type 2 diabetes	rs8054556	TMEM219	G	A	0.5699	-0.0317	0.0039	1.85e-16
Type 2 diabetes	rs8056890	ATP2A1	G	A	0.6775	-0.0295	0.0042	1.54e-12
Type 2 diabetes	rs8061528	SLX4	C	T	0.7573	-0.0346	0.0045	2.56e-14
Type 2 diabetes	rs8071043	ZZEF1	C	T	0.3318	0.0465	0.0041	5.35e-30
Type 2 diabetes	rs8107527	RN7SL836P	G	A	0.6245	-0.0542	0.004	4.23e-41
Type 2 diabetes	rs8192675	SLC2A2	C	T	0.3167	-0.0452	0.0042	3.85e-27
Type 2 diabetes	rs853866		T	A	0.6109	0.0244	0.0044	2.72e-08
Type 2 diabetes	rs860262	JAZF1	C	A	0.5683	0.0747	0.0039	2.92e-82
Type 2 diabetes	rs893617	AP3S2	C	T	0.2813	0.0537	0.0041	2.13e-38
Type 2 diabetes	rs917195	CRHR2	C	T	0.7224	0.0424	0.0046	1.49e-20
Type 2 diabetes	rs9308614		G	A	0.1338	-0.057	0.0058	4.51e-23
Type 2 diabetes	rs9316500	DLEU1	G	T	0.3528	-0.0401	0.0041	1.03e-22
Type 2 diabetes	rs9370243		G	T	0.8339	-0.0394	0.0061	1.03e-10
Type 2 diabetes	rs9379084	RREB1	G	A	0.843	0.0715	0.0062	5.31e-31
Type 2 diabetes	rs9384	GCDH	G	T	0.6566	0.0404	0.0041	8.36e-23
Type 2 diabetes	rs9390022		C	T	0.3361	-0.0306	0.0041	5e-14
Type 2 diabetes	rs9449295		C	T	0.5169	0.0216	0.0039	4.03e-08
Type 2 diabetes	rs9472139		G	C	0.7397	-0.0376	0.0044	1.44e-17
Type 2 diabetes	rs9479	PML	G	A	0.5244	0.0271	0.0037	4e-13
Type 2 diabetes	rs9515905	PPIAP23	G	A	0.2606	-0.0472	0.0044	2.06e-27
Type 2 diabetes	rs9560114		T	A	0.2435	-0.0259	0.0047	3.3e-08
Type 2 diabetes	rs9564268	HNRNPA3P5	C	T	0.544	-0.0243	0.004	7.67e-10
Type 2 diabetes	rs9587811	LINC00370	C	A	0.5464	0.0248	0.0038	4.91e-11
Type 2 diabetes	rs978444	RNU7-108P	G	T	0.4136	0.0229	0.0039	3.52e-09
Type 2 diabetes	rs9859406	IGF2BP2	G	A	0.6476	-0.1117	0.004	2.01e-169
Type 2 diabetes	rs9873519	SLC12A8	C	T	0.5288	-0.0373	0.0038	2.53e-22
Type 2 diabetes	rs9913225	CRYBA1	G	A	0.3742	0.0262	0.004	5.42e-11
Type 2 diabetes	rs9927842	PDXDC1	C	T	0.7886	-0.0307	0.005	6.97e-10
Type 2 diabetes	rs993380	SCD5	G	A	0.6352	-0.0272	0.0039	3.7e-12
Type 2 diabetes	rs9937296	ZFPM1	C	T	0.7708	0.0445	0.007	2.35e-10

## Sheet: Fasting glucose
Phenotype	SNP	Nearest gene	effect allele	other allele	eaf	beta	se	p-value
Fasting glucose	rs340874	PROX1-AS1	C	T	0.526	0.0157	0.002	1.34e-15
Fasting glucose	rs780094	GCKR	C	T	0.61	0.0308	0.0021	1.16e-49
Fasting glucose	rs560887	G6PC2	C	T	0.685	0.0689	0.0023	6.56e-190
Fasting glucose	rs11715915	AMT	C	T	0.668	0.0111	0.0022	2.5e-07
Fasting glucose	rs11708067	ADCY5	A	G	0.771	0.0228	0.0024	4.71e-22
Fasting glucose	rs11920090	SLC2A2	T	A	0.868	0.0266	0.003	1.85e-18
Fasting glucose	rs7651090	IGF2BP2	A	G	0.684	-0.0119	0.0023	2.78e-07
Fasting glucose	rs7708285	ZBED3-AS1	G	A	0.283	0.0111	0.0025	7.22e-06
Fasting glucose	rs4869272		C	T	0.324	-0.0174	0.0021	2.03e-16
Fasting glucose	rs17762454	RREB1	C	T	0.735	-0.01	0.0023	2.02e-05
Fasting glucose	rs9368222	CDKAL1	C	A	0.708	-0.0135	0.0023	2.99e-09
Fasting glucose	rs2191349		G	T	0.478	-0.0269	0.002	3.51e-40
Fasting glucose	rs4607517	GCK	G	A	0.839	-0.059	0.0028	4.32e-97
Fasting glucose	rs6943153	GRB10	C	T	0.654	-0.0154	0.0021	1.81e-13
Fasting glucose	rs983309		G	T	0.864	-0.0293	0.0031	2.09e-21
Fasting glucose	rs11558471	SLC30A8	A	G	0.671	0.0271	0.0022	5.09e-35
Fasting glucose	rs7034200	GLIS3	A	C	0.491	0.0159	0.0021	1.28e-14
Fasting glucose	rs10811661		T	C	0.803	0.0218	0.0028	6.71e-15
Fasting glucose	rs16913693	IKBKAP	T	G	0.947	0.0438	0.0061	5.98e-13
Fasting glucose	rs3829109	DNLZ	G	A	0.691	0.0153	0.0026	6.03e-09
Fasting glucose	rs10885122	BTBD7P2	G	T	0.862	0.0273	0.0032	7.09e-18
Fasting glucose	rs4506565	TCF7L2	A	T	0.694	-0.022	0.0022	7.65e-24
Fasting glucose	rs11605924	CRY2	A	C	0.489	0.023	0.0021	1.18e-26
Fasting glucose	rs174550	FADS2	T	C	0.647	0.0184	0.0021	8.78e-18
Fasting glucose	rs11603334	ARAP1	G	A	0.814	0.0199	0.0025	5.52e-15
Fasting glucose	rs10830963	MTNR1B	C	G	0.697	-0.0768	0.0025	1e-200
Fasting glucose	rs2657879	GLS2	A	G	0.802	-0.011	0.0028	6.73e-05
Fasting glucose	rs10747083		A	G	0.661	0.0148	0.0022	5.38e-11
Fasting glucose	rs11619319	PDX1-AS1	A	G	0.765	-0.018	0.0024	4.63e-14
Fasting glucose	rs3783347	WARS	G	T	0.772	0.0168	0.0025	2.31e-11
Fasting glucose	rs11071657	C2CD4B	A	G	0.63	0.0149	0.0028	9.23e-08
Fasting glucose	rs6113722	LINC00261	G	A	0.933	0.0363	0.0052	2.27e-12
Fasting glucose	rs6072275		G	A	0.814	-0.0174	0.0027	2.15e-10

## Sheet: Fasting insulin
Phenotype	SNP	Nearest gene	effect allele	other allele	eaf	beta	se	p-value
Fasting insulin	rs2820436		C	A	0.659159	0.015629	0.002646	3.58e-09
Fasting insulin	rs780094	GCKR	C	T	0.606271	0.019402	0.002491	7.13e-15
Fasting insulin	rs1530559	MAP3K19	A	G	0.553506	0.011831	0.002602	5.5e-06
Fasting insulin	rs10195252	COBLL1	C	T	0.412606	-0.012257	0.002503	9.87e-07
Fasting insulin	rs2943645		C	T	0.37627	-0.012569	0.002535	7.22e-07
Fasting insulin	rs17036328	PPARG	T	C	0.833253	0.013929	0.003653	0.000138
Fasting insulin	rs3822072	FAM13A	G	A	0.524619	-0.007472	0.002408	0.001926
Fasting insulin	rs9884482	TET2	T	C	0.605914	-0.014924	0.002475	1.69e-09
Fasting insulin	rs4865796	ARL15	A	G	0.657003	0.015619	0.002539	7.86e-10
Fasting insulin	rs459193		G	A	0.71215	0.014927	0.002686	2.8e-08
Fasting insulin	rs6912327		C	T	0.216334	-0.014816	0.003255	5.41e-06
Fasting insulin	rs2745353	RSPO3	T	C	0.511044	0.011284	0.002477	5.31e-06
Fasting insulin	rs1167800	HIP1	A	G	0.541908	0.017221	0.002565	1.96e-11
Fasting insulin	rs983309		G	T	0.8482	-0.028512	0.00368	9.8e-15
Fasting insulin	rs7903146	TCF7L2	C	T	0.713199	0.017926	0.00275	7.33e-11
Fasting insulin	rs35767	IGF1	G	A	0.803768	0.016271	0.003367	1.38e-06
Fasting insulin	rs1421085	FTO	T	C	0.578326	-0.018411	0.002529	3.5e-13
Fasting insulin	rs731839	PEPD	A	G	0.645264	-0.014221	0.002532	1.98e-08

## Sheet: HbA1c
Phenotype	SNP	Nearest gene	effect allele	other allele	eaf	beta	se	p-value
Glycated haemoglobin	rs2375278		A	G	0.1888	0.0113	0.0022	2.029e-07
Glycated haemoglobin	rs267738	CERS2	T	G	0.7701	0.0111	0.0019	2.594e-09
Glycated haemoglobin	rs12132919	CCT3	A	C	0.3081	0.0047	0.002	0.0169
Glycated haemoglobin	rs857691	SPTA1	T	C	0.2715	0.0193	0.0019	3.974e-25
Glycated haemoglobin	rs17509001	ATAD2B	C	T	0.1576	0.0181	0.0023	1.935e-15
Glycated haemoglobin	rs12621844		T	C	0.5999	0.0099	0.0018	1.865e-08
Glycated haemoglobin	rs13387347	SPC25	T	C	0.457	0.0019	0.0019	0.308
Glycated haemoglobin	rs560887	G6PC2	C	T	0.6843	0.0284	0.0018	1.48e-58
Glycated haemoglobin	rs17256082	SCRN3	C	T	0.364	0.0054	0.0017	0.001117
Glycated haemoglobin	rs7616006	GSTM5P1	A	G	0.5744	0.0103	0.0017	5.068e-10
Glycated haemoglobin	rs9818758	USP4	A	G	0.2028	0.0121	0.002	7.735e-10
Glycated haemoglobin	rs11708067	ADCY5	A	G	0.7542	0.0132	0.0019	1.419e-12
Glycated haemoglobin	rs8192675	SLC2A2	T	C	0.6906	0.0112	0.0017	1.378e-11
Glycated haemoglobin	rs4894799	FNDC3B	A	G	0.6214	0.0089	0.0019	1.796e-06
Glycated haemoglobin	rs13134327		A	G	0.3335	0.0131	0.0017	2.636e-15
Glycated haemoglobin	rs7756992	CDKAL1	G	A	0.2862	0.0123	0.0018	2.799e-12
Glycated haemoglobin	rs1800562		G	A	0.9279	0.0398	0.0036	4.669e-28
Glycated haemoglobin	rs198846		G	A	0.8293	0.0218	0.0022	1.179e-23
Glycated haemoglobin	rs11964178	C6orf183	A	G	0.5666	0.0096	0.0016	6.379e-10
Glycated haemoglobin	rs11154792		T	C	0.7415	0.0205	0.0024	7.451e-18
Glycated haemoglobin	rs592423		A	C	0.4566	0.0091	0.0017	3.959e-08
Glycated haemoglobin	rs2191349		T	G	0.532	0.0086	0.0017	2.093e-07
Glycated haemoglobin	rs4607517	GCK	A	G	0.2017	0.0306	0.0024	8.755e-38
Glycated haemoglobin	rs3824065	YKT6	C	T	0.5557	0.0192	0.0016	4.219e-35
Glycated haemoglobin	rs6474359	ANK1	T	C	0.953	0.0436	0.0053	1.504e-16
Glycated haemoglobin	rs4737009	ANK1	A	G	0.2531	0.0212	0.002	4.484e-27
Glycated haemoglobin	rs6980507	SLC20A2	A	G	0.4014	0.0097	0.0018	3.579e-08
Glycated haemoglobin	rs11558471	SLC30A8	A	G	0.6745	0.015	0.0017	1.38e-19
Glycated haemoglobin	rs2383208		A	G	0.7992	0.0142	0.0021	7.042e-12
Glycated haemoglobin	rs7040409	PCNPP2	C	G	0.8953	0.0284	0.0037	2.563e-14
Glycated haemoglobin	rs1467311		G	A	0.3508	0.0086	0.0017	2.093e-07
Glycated haemoglobin	rs579459	ABO	C	T	0.2389	0.0107	0.0019	9.422e-09
Glycated haemoglobin	rs4745982	HK1	T	G	0.8726	0.0954	0.0056	2.87e-65
Glycated haemoglobin	rs10823343	HK1	A	G	0.7223	0.0325	0.0021	1.679e-55
Glycated haemoglobin	rs17747324	TCF7L2	C	T	0.2489	0.0149	0.0023	6.122e-11
Glycated haemoglobin	rs3782123		C	A	0.3205	0.0126	0.002	1.509e-10
Glycated haemoglobin	rs2237896	KCNQ1	G	A	0.9159	0.0116	0.0038	0.002464
Glycated haemoglobin	rs174577	FADS2	C	A	0.6485	0.0083	0.0017	5.448e-07
Glycated haemoglobin	rs11603334	ARAP1	G	A	0.815	0.012	0.0021	6.853e-09
Glycated haemoglobin	rs10830963	MTNR1B	G	C	0.2938	0.0196	0.002	2.225e-23
Glycated haemoglobin	rs11224302	RN7SL222P	C	T	0.869	0.0146	0.0029	4.762e-07
Glycated haemoglobin	rs2110073	EMG1	T	C	0.1097	0.0153	0.0028	4.436e-08
Glycated haemoglobin	rs2408955		T	G	0.5039	0.0124	0.0016	1.422e-15
Glycated haemoglobin	rs10774625	ATXN2	G	A	0.5056	0.0088	0.0016	1.464e-08
Glycated haemoglobin	rs11619319	PDX1-AS1	G	A	0.2327	0.0094	0.0019	4.575e-07
Glycated haemoglobin	rs576674	TOMM22P3	G	A	0.1883	0.0099	0.0023	1.387e-05
Glycated haemoglobin	rs282587	ATP11A	G	A	0.1513	0.019	0.0027	1.697e-12
Glycated haemoglobin	rs9604573	GAS6	T	C	0.2738	0.0101	0.0018	9.599e-09
Glycated haemoglobin	rs11248914	ITFG3	T	C	0.647	0.0142	0.0019	2.563e-14
Glycated haemoglobin	rs1558902	FTO	A	T	0.4128	0.0103	0.0019	3.272e-08
Glycated haemoglobin	rs4783565	CDH3	A	G	0.2941	0.0092	0.0018	1.728e-07
Glycated haemoglobin	rs837763	PIEZO1	T	C	0.5548	0.0172	0.0016	1.679e-28
Glycated haemoglobin	rs9914988	ERAL1	A	G	0.7877	0.0131	0.002	2.765e-11
Glycated haemoglobin	rs2073285	TMC6	C	T	0.7517	0.0127	0.0033	0.0001267
Glycated haemoglobin	rs1046896	FN3KRP	T	C	0.3162	0.028	0.0017	4.456e-64
Glycated haemoglobin	rs11086054	MYO9B	A	T	0.6753	0.0097	0.0022	8.164e-06
Glycated haemoglobin	rs17533903	MYO9B	A	G	0.2428	0.015	0.0022	5.267e-12
Glycated haemoglobin	rs4820268	TMPRSS6	G	A	0.4606	0.0162	0.0017	1.397e-22

## Sheet: Hypertension SBP
Phenotype	SNP	Nearest gene	effect allele	other allele	eaf	beta	se	p-value
Systolic blood pressure	rs76719272	SEMA4A	T	C	0.1286	-0.2394	0.0376	1.98e-10
Systolic blood pressure	rs1043069	XPR1	T	G	0.6183	0.1995	0.0255	5.19e-15
Systolic blood pressure	rs4651224	C1orf21	T	C	0.4502	0.1944	0.025	7.29e-15
Systolic blood pressure	rs12042924	CRB1	T	C	0.531	-0.1615	0.0247	6.26e-11
Systolic blood pressure	rs7555285	IRF6	C	G	0.8013	0.1961	0.0304	1.09e-10
Systolic blood pressure	rs260508	SKI	T	G	0.6135	0.1485	0.0254	5.17e-09
Systolic blood pressure	rs4926499		C	G	0.8245	0.2954	0.0374	2.91e-15
Systolic blood pressure	rs79598313	C1orf172	T	C	0.0251	0.5926	0.0805	1.82e-13
Systolic blood pressure	rs839755	SZT2	A	C	0.6191	-0.2274	0.0251	1.36e-19
Systolic blood pressure	rs7514579	BCAR3	A	C	0.771	0.1969	0.0293	1.73e-11
Systolic blood pressure	rs11197813	RPL5P27	A	G	0.7026	-0.1801	0.0268	1.84e-11
Systolic blood pressure	rs7912283	PPP2R2D	A	G	0.3541	0.1943	0.0259	6.76e-14
Systolic blood pressure	rs1133400	INPP5A	A	G	0.7883	-0.2607	0.0303	7.04e-18
Systolic blood pressure	rs34130368	GDF2	T	G	0.1166	-0.2715	0.0394	5.64e-12
Systolic blood pressure	rs56352451	FAM208B	T	C	0.1329	0.1992	0.0358	2.54e-08
Systolic blood pressure	rs12572586		T	C	0.9369	-0.3646	0.0517	1.83e-12
Systolic blood pressure	rs11031051	ARL14EP	A	C	0.6856	-0.1899	0.0264	5.8e-13
Systolic blood pressure	rs190194639	CAPRIN1	T	C	0.0767	0.2746	0.0468	4.55e-09
Systolic blood pressure	rs1585453	LRP4-AS1	A	T	0.8908	-0.3892	0.0412	3.53e-21
Systolic blood pressure	rs4980515		T	C	0.4951	0.2086	0.0251	9.07e-17
Systolic blood pressure	rs10743086	ST5	A	G	0.207	-0.1832	0.0303	1.57e-09
Systolic blood pressure	rs5742643	IGF1	A	C	0.2504	-0.2236	0.0282	2.15e-15
Systolic blood pressure	rs11571376	RAD52	C	G	0.7044	-0.1884	0.0271	3.49e-12
Systolic blood pressure	rs2024385	APOLD1	A	T	0.4234	-0.2326	0.0256	1.05e-19
Systolic blood pressure	rs7976167	SOX5	T	C	0.6858	0.1638	0.0266	7.21e-10
Systolic blood pressure	rs10437954	ARHGEF25	A	G	0.9036	-0.3471	0.0424	2.64e-16
Systolic blood pressure	rs7963801	SYT1	T	C	0.4149	-0.2027	0.0256	2.29e-15
Systolic blood pressure	rs10858966		C	G	0.2933	0.254	0.0277	5.56e-20
Systolic blood pressure	rs9532243	RXFP2	A	C	0.4808	0.2709	0.0243	6.43e-29
Systolic blood pressure	rs73187288	DGKH	A	C	0.8932	-0.2558	0.04	1.57e-10
Systolic blood pressure	rs912434	LRCH1	T	G	0.7616	0.2151	0.0287	6.27e-14
Systolic blood pressure	rs78474310	RNY1P8	A	G	0.9564	-0.4828	0.06	8.38e-16
Systolic blood pressure	rs7988232	BCAS2P3	A	G	0.416	0.148	0.0249	2.99e-09
Systolic blood pressure	rs8014182	MARK3	T	C	0.1357	-0.3397	0.0361	4.99e-21
Systolic blood pressure	rs17115145		T	C	0.397	0.1569	0.025	3.74e-10
Systolic blood pressure	rs72683923	L2HGDH	T	C	0.9797	0.9769	0.0934	1.4e-25
Systolic blood pressure	rs11623535	RGS6	A	G	0.7426	0.2022	0.0277	3.02e-13
Systolic blood pressure	rs4965529	MEF2A	T	C	0.1705	-0.2497	0.0325	1.42e-14
Systolic blood pressure	rs11634028	NRG4	A	T	0.2069	0.2258	0.0316	9.46e-13
Systolic blood pressure	rs11632436		C	G	0.5013	0.2056	0.0245	5.11e-17
Systolic blood pressure	rs35450617	RBFOX1	T	G	0.7	-0.1609	0.0269	2.33e-09
Systolic blood pressure	rs7187540	LINC00311	A	C	0.3368	-0.1766	0.0274	1.08e-10
Systolic blood pressure	rs4925159	TOP3A	A	G	0.4274	0.2281	0.0247	2.27e-20
Systolic blood pressure	rs1551355		T	C	0.2341	0.1932	0.0288	1.96e-11
Systolic blood pressure	rs34430710	PPM1E	A	T	0.6775	-0.2069	0.0264	4.26e-15
Systolic blood pressure	rs1036902	BCAS3	T	C	0.8442	-0.2273	0.0338	1.85e-11
Systolic blood pressure	rs112280096		A	C	0.3604	-0.1706	0.0264	1.13e-10
Systolic blood pressure	rs10048404	WDR7	T	C	0.3654	-0.2277	0.027	3.1e-17
Systolic blood pressure	rs34413141	YES1	A	T	0.1816	-0.3084	0.0325	2.1e-21
Systolic blood pressure	rs2613765	KDM4B	A	G	0.4697	-0.2336	0.0244	9.01e-22
Systolic blood pressure	rs138877676	MYBPC2	T	G	0.0192	-0.6556	0.1034	2.27e-10
Systolic blood pressure	rs28377357	MERTK	A	G	0.2933	-0.1862	0.0267	3.37e-12
Systolic blood pressure	rs72844590	THSD7B	T	G	0.1489	0.2083	0.0356	4.77e-09
Systolic blood pressure	rs79523138	RBMS1	A	G	0.8849	-0.2629	0.0398	3.82e-11
Systolic blood pressure	rs6739913	MIR548AE1	A	G	0.2846	0.1675	0.0271	6.4e-10
Systolic blood pressure	rs28558491		T	C	0.735	-0.1874	0.0278	1.47e-11
Systolic blood pressure	rs67720684		A	C	0.239	0.2039	0.0291	2.26e-12
Systolic blood pressure	rs12694277	ERBB4	T	C	0.2966	-0.1765	0.0271	7.61e-11
Systolic blood pressure	rs1044822	TRIP12	T	C	0.1465	-0.2275	0.0348	6.15e-11
Systolic blood pressure	rs139354822	FARP2	T	C	0.9691	0.5473	0.0768	1.06e-12
Systolic blood pressure	rs35590893	THADA	A	G	0.2738	-0.2152	0.0275	4.65e-15
Systolic blood pressure	rs72816333		A	T	0.8282	0.2225	0.0323	5.88e-12
Systolic blood pressure	rs2300481	MEIS1	T	C	0.3857	0.1949	0.0251	8.01e-15
Systolic blood pressure	rs6021247	NFATC2	A	G	0.5327	0.2041	0.0243	4.29e-17
Systolic blood pressure	rs28578714	PLXNB2	T	C	0.6071	0.1951	0.0258	4.17e-14
Systolic blood pressure	rs1882289	ZBTB20	A	G	0.8841	-0.2159	0.0379	1.26e-08
Systolic blood pressure	rs9875380	TMEM108	T	C	0.4614	-0.1651	0.0245	1.7e-11
Systolic blood pressure	rs78151625	MLF1	T	C	0.8337	-0.2108	0.033	1.6e-10
Systolic blood pressure	rs189267552	KAT2B	A	T	0.0128	-0.783	0.1154	1.14e-11
Systolic blood pressure	rs12638085		A	T	0.3504	0.2132	0.0265	8.36e-16
Systolic blood pressure	rs6788984		A	G	0.8557	0.2558	0.0353	3.96e-13
Systolic blood pressure	rs6774721	USP4	C	G	0.8782	0.2457	0.039	3e-10
Systolic blood pressure	rs7439567		T	C	0.4155	0.2355	0.0251	7.35e-21
Systolic blood pressure	rs17035181		T	G	0.8548	0.2949	0.0348	2.17e-17
Systolic blood pressure	rs2610990	LCORL	A	G	0.2607	-0.2573	0.028	3.82e-20
Systolic blood pressure	rs231708	FAM193A	C	G	0.6921	-0.2281	0.0264	5.24e-18
Systolic blood pressure	rs12511987	RNU6-412P	T	G	0.8191	-0.2153	0.0323	2.71e-11
Systolic blood pressure	rs1347345	BMPR1B	A	G	0.6163	-0.1792	0.0253	1.45e-12
Systolic blood pressure	rs62373688		A	T	0.129	0.2607	0.0378	5.49e-12
Systolic blood pressure	rs10069690	TERT	T	C	0.2591	0.2735	0.029	3.78e-21
Systolic blood pressure	rs702395	VTRNA1-1	T	C	0.4381	0.191	0.0246	8.25e-15
Systolic blood pressure	rs74774746		C	G	0.2612	-0.1705	0.0285	2.08e-09
Systolic blood pressure	rs13179413		T	C	0.2786	0.2045	0.0284	5.57e-13
Systolic blood pressure	rs246973	VWA8P1	T	C	0.2871	0.2244	0.0278	7.25e-16
Systolic blood pressure	rs709668		A	G	0.2027	-0.2534	0.0306	1.24e-16
Systolic blood pressure	rs9401090		T	C	0.7501	0.1637	0.0285	9.25e-09
Systolic blood pressure	rs10782230	NCOA7	A	G	0.4831	0.1995	0.0246	5.27e-16
Systolic blood pressure	rs7763294		T	G	0.3161	-0.1804	0.0263	6.85e-12
Systolic blood pressure	rs2745599	FOXC1	A	G	0.5514	0.1908	0.0253	4.17e-14
Systolic blood pressure	rs9368222	CDKAL1	A	C	0.2695	0.2301	0.0273	3.85e-17
Systolic blood pressure	rs34072724	KLF14	A	G	0.487	-0.2181	0.0244	4.09e-19
Systolic blood pressure	rs11771693		A	G	0.6721	0.1673	0.0265	2.72e-10
Systolic blood pressure	rs10233127	AQP1	A	T	0.1092	0.3025	0.0409	1.48e-13
Systolic blood pressure	rs6593297	CCT6A	A	T	0.2999	0.1581	0.0274	8.38e-09
Systolic blood pressure	rs848445	PHTF2	T	C	0.2777	-0.2004	0.0279	6.57e-13
Systolic blood pressure	rs1986971	MSRA	A	G	0.7045	0.2377	0.0274	3.93e-18
Systolic blood pressure	rs4598218		T	C	0.6118	0.1797	0.0254	1.5e-12
Systolic blood pressure	rs4129585	TSNARE1	A	C	0.4392	0.1749	0.0246	1.06e-12
Systolic blood pressure	rs1906672	DDHD2	A	G	0.2303	0.2715	0.0291	1.03e-20
Systolic blood pressure	rs6996733		T	C	0.8458	0.1882	0.0341	3.34e-08
Systolic blood pressure	rs72688070	ZBTB10	T	C	0.171	-0.241	0.0326	1.56e-13
Systolic blood pressure	rs7023828		T	C	0.4181	-0.2436	0.0249	1.22e-22
Systolic blood pressure	rs1891730	FAM129B	T	C	0.6157	-0.1785	0.0256	2.95e-12
Systolic blood pressure	rs1332813	PTPRD	T	C	0.3491	0.1965	0.0259	3.58e-14
Systolic blood pressure	rs7045409	CENPP	A	T	0.3702	-0.1823	0.0255	9.15e-13

## Sheet: Hypertension DBP
Phenotype	SNP	Nearest gene	effect allele	other allele	eaf	beta	se	p-value
Diastolic blood pressure	rs12078697		C	G	0.2103	-0.1083	0.0186	5.46e-09
Diastolic blood pressure	rs1886914		T	G	0.4094	-0.1113	0.0154	4.18e-13
Diastolic blood pressure	rs72704264	CD160	C	G	0.2138	0.1173	0.0188	4.23e-10
Diastolic blood pressure	rs35981664	TGFB2	A	T	0.6914	-0.1542	0.0166	1.46e-20
Diastolic blood pressure	rs1565716	MECR	A	G	0.0696	0.2012	0.0298	1.49e-11
Diastolic blood pressure	rs12142296	PIK3R3	T	G	0.8643	-0.1716	0.0222	1.1e-14
Diastolic blood pressure	rs34517439	GIPC2	A	C	0.1169	-0.233	0.0248	4.84e-21
Diastolic blood pressure	rs603424	PKD2L1	A	G	0.1815	0.1717	0.0202	1.81e-17
Diastolic blood pressure	rs4411245	CTBP2	A	G	0.2934	0.1023	0.0165	5.92e-10
Diastolic blood pressure	rs10906391	BEND7	T	C	0.3221	0.121	0.0163	1.32e-13
Diastolic blood pressure	rs61892344		T	C	0.1736	-0.1162	0.0199	5.64e-09
Diastolic blood pressure	rs11026586		A	G	0.0726	0.2606	0.0299	3.17e-18
Diastolic blood pressure	rs17224476	OR51E1	A	G	0.1103	0.1547	0.0241	1.3e-10
Diastolic blood pressure	rs2929184	CCKBR	A	G	0.77	0.1164	0.0187	5.05e-10
Diastolic blood pressure	rs875106	ANO1	A	G	0.5229	-0.1217	0.0151	7.66e-16
Diastolic blood pressure	rs360153	SWAP70	T	C	0.4152	-0.1917	0.0152	2.71e-36
Diastolic blood pressure	rs3898618	RPS27P25	T	C	0.9458	-0.2532	0.0336	4.76e-14
Diastolic blood pressure	rs1271309	NCOR2	A	G	0.1603	-0.1786	0.0209	1.36e-17
Diastolic blood pressure	rs1098708		A	G	0.5411	-0.0931	0.0152	9.3e-10
Diastolic blood pressure	rs75507123		T	G	0.1281	-0.1396	0.0227	8.47e-10
Diastolic blood pressure	rs7137749	PTGES3	T	C	0.3668	0.132	0.0157	4.47e-17
Diastolic blood pressure	rs7134060	CDK17	A	G	0.446	-0.0999	0.0151	4.01e-11
Diastolic blood pressure	rs12583637	TRIM13	A	G	0.1326	0.1671	0.0223	6.46e-14
Diastolic blood pressure	rs9563529	PCDH17	T	G	0.2058	0.1173	0.0188	4.27e-10
Diastolic blood pressure	rs55684003	MBNL2	A	G	0.6991	0.1193	0.0164	4.03e-13
Diastolic blood pressure	rs17880989	MMP14	A	G	0.0256	0.3648	0.0506	5.58e-13
Diastolic blood pressure	rs4424827	SNX6	T	C	0.5663	-0.0948	0.0152	4.17e-10
Diastolic blood pressure	rs11628933	PPM1A	C	G	0.2321	-0.1338	0.0179	7.4e-14
Diastolic blood pressure	rs62004794	PIAS1	A	G	0.4418	-0.0948	0.0151	3.77e-10
Diastolic blood pressure	rs7180952	ZSCAN2	T	C	0.5421	-0.0984	0.0153	1.19e-10
Diastolic blood pressure	rs873122		C	G	0.7199	0.1147	0.017	1.62e-11
Diastolic blood pressure	rs59333122		A	C	0.2724	0.1069	0.0179	2.36e-09
Diastolic blood pressure	rs6565174		A	C	0.1104	-0.1821	0.0243	6.63e-14
Diastolic blood pressure	rs45474499	PDP2	T	C	0.0469	0.3433	0.0362	2.52e-21
Diastolic blood pressure	rs9932866		A	G	0.369	0.1098	0.0158	3.41e-12
Diastolic blood pressure	rs11080134	ATAD5	A	G	0.6464	-0.0974	0.0159	9.27e-10
Diastolic blood pressure	rs8069739	TMEM107	T	C	0.32	-0.1082	0.0161	1.98e-11
Diastolic blood pressure	rs11665020	PIEZO2	C	G	0.3201	-0.1371	0.0163	4.55e-17
Diastolic blood pressure	rs34163044	STARD6	A	C	0.4184	0.1488	0.0157	2.04e-21
Diastolic blood pressure	rs1821295		T	C	0.6998	-0.1347	0.0165	2.78e-16
Diastolic blood pressure	rs13001283		A	G	0.1596	0.1513	0.0207	2.73e-13
Diastolic blood pressure	rs7606205		A	C	0.7007	-0.1207	0.0166	3.69e-13
Diastolic blood pressure	rs1220128	ACVR1C	C	G	0.8525	0.1733	0.0214	5.49e-16
Diastolic blood pressure	rs2390258	CSRNP3	A	G	0.3079	-0.1031	0.0163	2.68e-10
Diastolic blood pressure	rs1996992	CYP27A1	T	G	0.052	-0.2964	0.0344	6.54e-18
Diastolic blood pressure	rs1607644		A	G	0.3639	-0.1035	0.0155	2.75e-11
Diastolic blood pressure	rs56236159	COLEC11	T	G	0.1457	-0.1285	0.0219	4.77e-09
Diastolic blood pressure	rs2707238	LINC00211	C	G	0.2842	0.1019	0.0168	1.37e-09
Diastolic blood pressure	rs4851462	ZAP70	T	C	0.6262	-0.1138	0.0158	6.43e-13
Diastolic blood pressure	rs1232482	BTBD3	T	C	0.401	-0.1155	0.0153	4.78e-14
Diastolic blood pressure	rs62229372	MORC3	T	C	0.1269	0.1446	0.024	1.69e-09
Diastolic blood pressure	rs11923667	TRMT10C	A	T	0.4097	0.1222	0.0153	1.69e-15
Diastolic blood pressure	rs1706003	TMEM44-AS1	T	G	0.4652	0.1326	0.0157	2.76e-17
Diastolic blood pressure	rs6777317		A	G	0.2949	0.1147	0.0168	8.35e-12
Diastolic blood pressure	rs4634143	RPL24P7	T	C	0.2975	0.1129	0.0166	9.05e-12
Diastolic blood pressure	rs113134141	PRSS50	A	G	0.8985	-0.1569	0.025	3.47e-10
Diastolic blood pressure	rs9865843	GRM7	A	G	0.5197	-0.0906	0.0153	3.42e-09
Diastolic blood pressure	rs17248480	BANK1	A	G	0.0286	-0.5064	0.0479	4.07e-26
Diastolic blood pressure	rs55829085	POLN	A	C	0.9545	-0.2672	0.0371	5.73e-13
Diastolic blood pressure	rs28667801	STIM2	A	T	0.593	-0.1449	0.0157	2.28e-20
Diastolic blood pressure	rs1718845	IGFBP7	A	G	0.2973	-0.0963	0.0165	5.14e-09
Diastolic blood pressure	rs55747751	HSPA4	A	G	0.0795	-0.2159	0.0288	6.07e-14
Diastolic blood pressure	rs954767		A	C	0.7391	-0.1389	0.0171	4.71e-16
Diastolic blood pressure	rs10062049	KIF2A	T	C	0.1365	0.2113	0.0221	1.43e-21
Diastolic blood pressure	rs4286632	MAST4	A	G	0.7299	0.127	0.017	9.26e-14
Diastolic blood pressure	rs668459		T	C	0.5858	-0.1219	0.0152	1.07e-15
Diastolic blood pressure	rs598682	OPRM1	A	G	0.2505	-0.1153	0.0173	2.59e-11
Diastolic blood pressure	rs9472135		T	C	0.6999	0.1444	0.0165	2.09e-18
Diastolic blood pressure	rs73033340	ZFAND2A	A	G	0.9617	0.4615	0.0456	4.42e-24
Diastolic blood pressure	rs1722886	AKR1B10	A	T	0.567	0.1166	0.0153	2.37e-14
Diastolic blood pressure	rs9638084	LINC01006	A	G	0.3956	0.1107	0.0155	8.93e-13
Diastolic blood pressure	rs73049928	FOXK1	A	G	0.8072	-0.1167	0.0195	2.13e-09
Diastolic blood pressure	rs2222544	AUTS2	T	C	0.7368	-0.0987	0.0171	8.53e-09
Diastolic blood pressure	rs34324971	GTF2I	A	G	0.1864	0.1199	0.0199	1.81e-09
Diastolic blood pressure	rs1947228	MARK2P10	T	C	0.4194	-0.1451	0.0153	2.39e-21
Diastolic blood pressure	rs10087782	PTK2	T	C	0.448	0.1211	0.0151	1.21e-15
Diastolic blood pressure	rs1047030	SORBS3	A	G	0.8052	0.1291	0.0205	3.01e-10
Diastolic blood pressure	rs7020564	ZNF462	A	T	0.6985	-0.1105	0.0169	6.79e-11
